# Supplementary material for: Assembly of organic–inorganic hybrid supramolecular materials based on {P2W18O62}6− anion and Cu(ii)/Mn(ii) complex
Source: Royal Society of Chemistry journal article supplement (doi:10.1039/c3ce40088c), 2013-01-01
Supplement: c3ce40088c.pdf [file c3ce40088c.pdf]

## Supporting information

# Assembly of Organic-inorganic Hybrid Supramolecular Materials Based on $\{P_2W_{18}O_{62}\}^{6-}$ Anion and Cu(II)/Mn(II) Complex

Kai Yu<sup>†,‡</sup>, Yang Yu<sup>†,‡</sup>, Bodong Jiang<sup>§</sup>, Bai-Bin Zhou<sup>\*†,‡</sup>

### 1. Structural figures

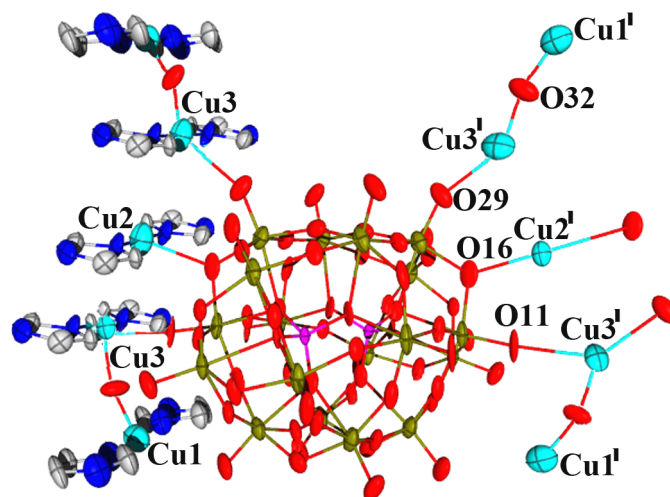

**Figure S1.** ORTEP view of the basic units in compound **1** with 50% thermal ellipsoids.

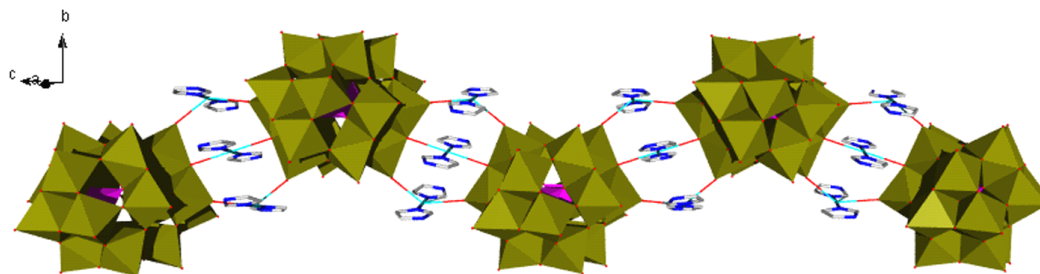

**Figure S2.** 1-D chain of the hybrids based on  $\{P_2W_{18}\}$  units and  $\{Cu(imi)_2\}$  linkers in **1**

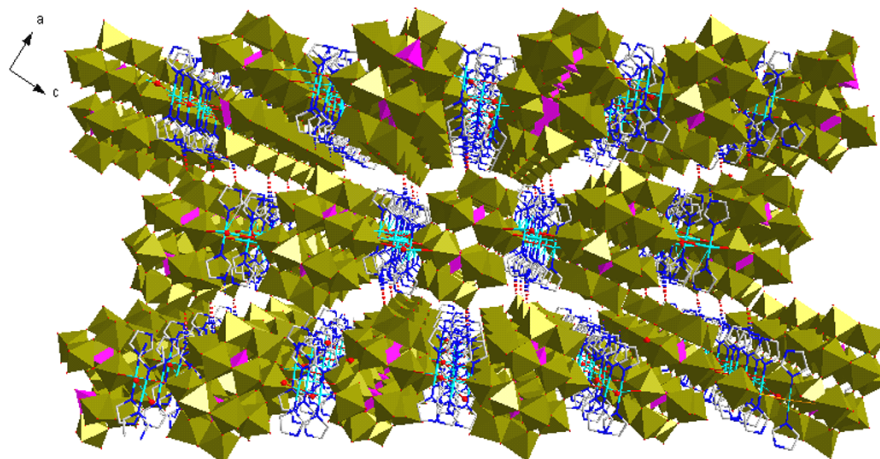

**Figure S3** The 3D supramolecular framework along the b axis of **1**. The broken lines represent the hydrogen bonding interactions. The isolated water molecules are omitted for clarity.

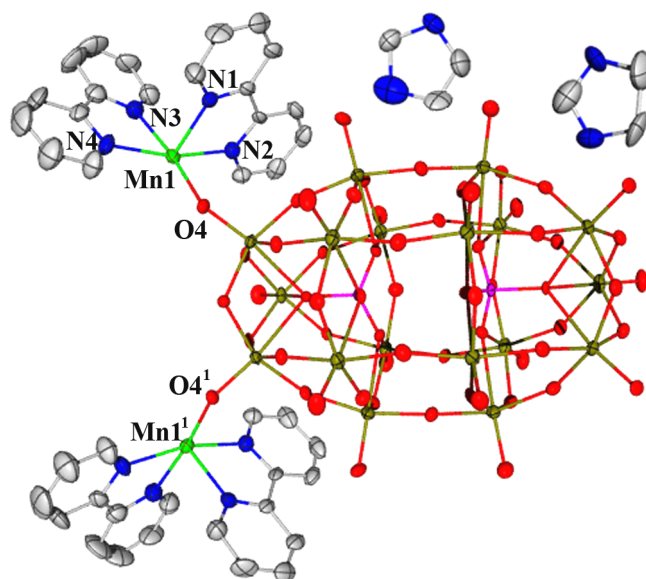

**Figure S4.** ORTEP view of the basic units in compound **2** with 50% thermal ellipsoids.

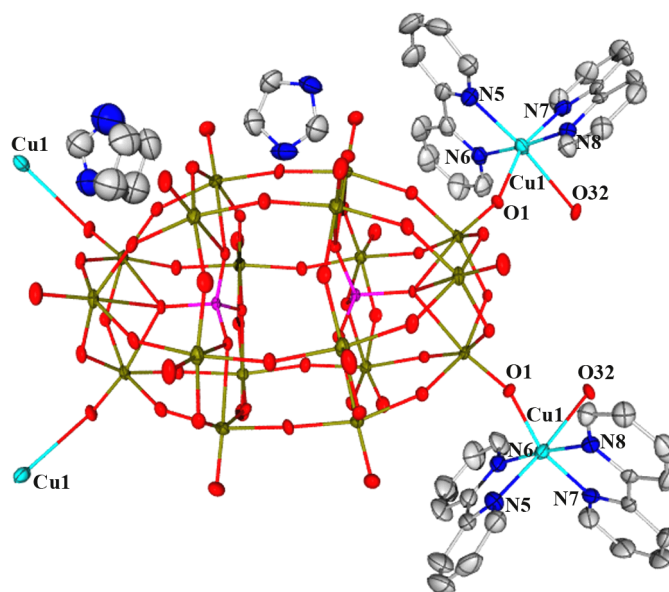

**Figure S5.** ORTEP view of the basic units in compound **3** with 50% thermal ellipsoids.

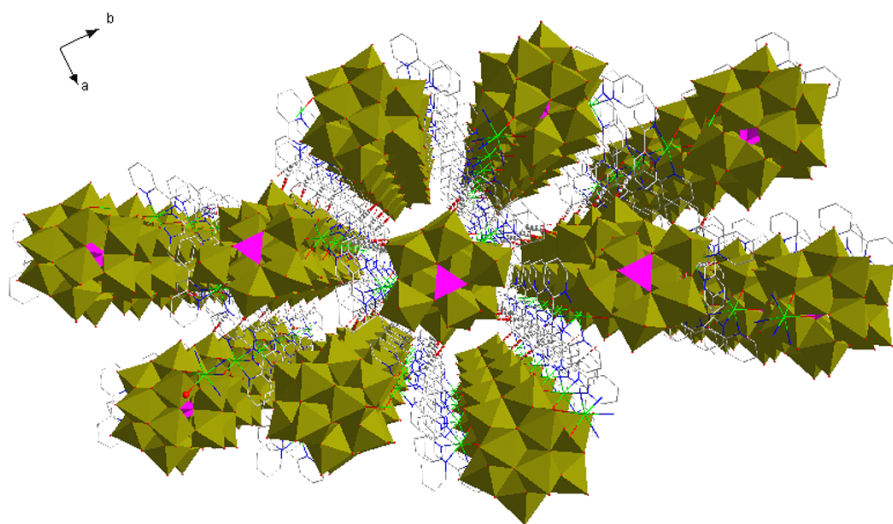

**Figure S6.** The 3D supramolecular framework along the b axis of **2**. The broken lines represent the hydrogen bonding interactions. The isolated water molecules are omitted for clarity.

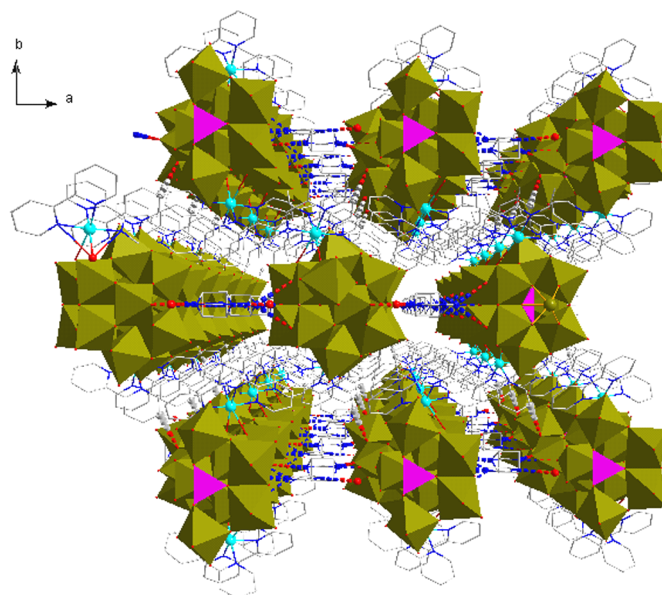

**Figure S7.** The 3D supramolecular framework along the c axis of **3**. The broken lines represent the hydrogen bonding interactions. The isolated water molecules are omitted for clarity.

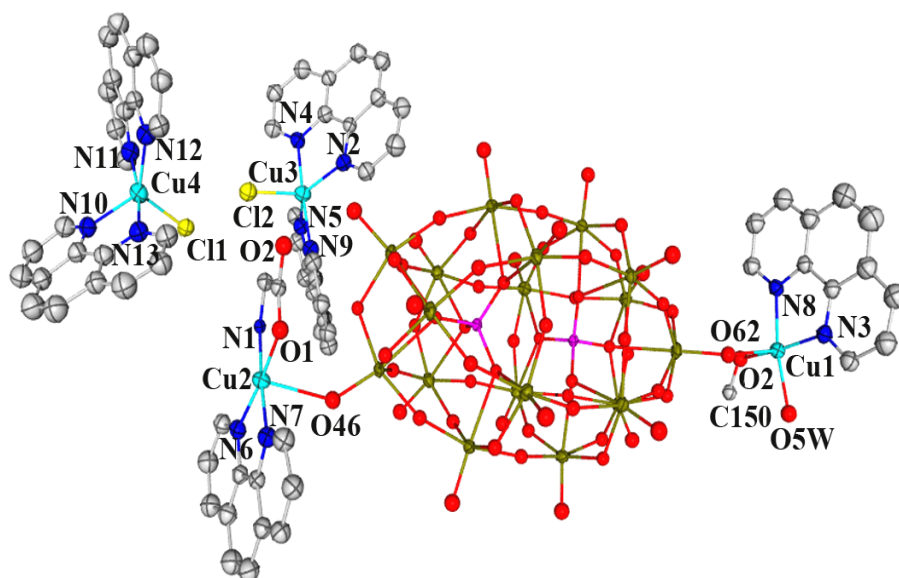

**Figure S8.** ORTEP view of the basic units in compound **4** with 50% thermal ellipsoids.

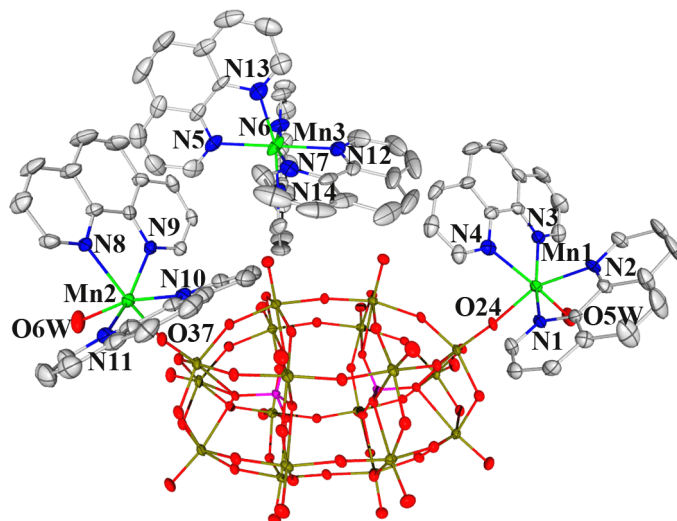

**Figure S9.** ORTEP view of the basic units in compound **5** with 50% thermal ellipsoids.

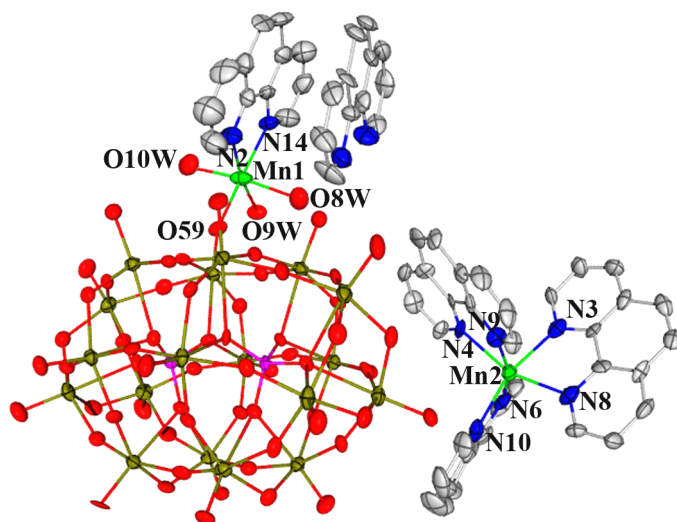

**Figure S10.** ORTEP view of the basic units in compound **6** with 50% thermal ellipsoids.

## 2. Structural data

**Table S1** Selected bond lengths (Å) and bond angles (°) of compound **1**

|                    |            |                    |           |                    |           |
|--------------------|------------|--------------------|-----------|--------------------|-----------|
| W(1)-O(25)         | 1.723(12)  | W(2)-O(20)         | 1.697(12) | W(3)-O(23)         | 1.696(12) |
| W(1)-O(9)          | 1.874(13)  | W(2)-O(21)         | 1.878(15) | W(3)-O(5)          | 1.881(11) |
| W(1)-O(24)         | 1.890(12)  | W(2)-O(19)         | 1.886(15) | W(3)-O(2)          | 1.883(13) |
| W(1)-O(12)         | 1.904(12)  | W(2)-O(13)#1       | 1.904(11) | W(3)-O(24)         | 1.921(12) |
| W(1)-O(14)         | 1.937(13)  | W(2)-O(12)         | 1.915(11) | W(3)-O(15)         | 1.926(12) |
| W(1)-O(1)          | 2.365(11)  | W(2)-O(8)          | 2.332(12) | W(3)-O(1)          | 2.380(10) |
| W(4)-O(28)         | 1.687(14)  | W(5)-O(11)         | 1.686(12) | W(6)-O(26)         | 1.695(13) |
| W(4)-O(18)         | 1.875(14)  | W(5)-O(13)         | 1.875(11) | W(6)-O(14)         | 1.891(12) |
| W(4)-O(3)          | 1.886(13)  | W(5)-O(3)          | 1.890(14) | W(6)-O(7)          | 1.894(12) |
| W(4)-O(15)         | 1.889(11)  | W(5)-O(16)         | 1.895(15) | W(6)-O(4)          | 1.904(12) |
| W(4)-O(17)#1       | 1.935(11)  | W(5)-O(5)          | 1.930(11) | W(6)-O(2)          | 1.916(12) |
| W(4)-O(30)         | 2.349(13)  | W(5)-O(6)          | 2.333(11) | W(6)-O(1)          | 2.378(12) |
| W(7)-O(29)         | 1.689(15)  | W(8)-O(31)         | 1.693(14) | W(9)-O(27)         | 1.704(13) |
| W(7)-O(10)         | 1.895(11)  | W(8)-O(22)         | 1.867(13) | W(9)-O(17)         | 1.863(11) |
| W(7)-O(16)         | 1.905(13)  | W(8)-O(10)#1       | 1.886(11) | W(9)-O(21)         | 1.890(14) |
| W(7)-O(22)         | 1.908(13)  | W(8)-O(19)         | 1.923(13) | W(9)-O(18)         | 1.925(13) |
| W(7)-O(4)          | 1.911(11)  | W(8)-O(7)          | 1.934(11) | W(9)-O(9)          | 1.962(11) |
| W(7)-O(6)          | 2.341(13)  | W(8)-O(8)          | 2.364(13) | W(9)-O(30)         | 2.327(13) |
| Cu(1)-N(1)         | 1.85(2)    | Cu(1)-N(1)#2       | 1.85(2)   | Cu(1)-O(32)        | 1.939(10) |
| Cu(1)-O(32)#2      | 1.939(10)  | Cu(2)-N(2)#3       | 1.933(15) | Cu(2)-N(2)         | 1.933(15) |
| Cu(3)-N(4)         | 1.97(3)    | Cu(3)-N(3)         | 1.92(3)   | Cu(3)-O(32)        | 1.930(10) |
| P(1)-O(8)          | 1.542(12)  | P(1)-O(30)         | 1.544(15) | P(1)-O(6)          | 1.547(12) |
| P(1)-O(1)          | 1.568(10)  |                    |           |                    |           |
| O(25)-W(1)-O(9)    | 101.1(6)   | O(20)-W(2)-O(21)   | 101.9(7)  | O(23)-W(3)-O(5)    | 101.2(6)  |
| O(25)-W(1)-O(24)   | 101.0(5)   | O(20)-W(2)-O(19)   | 100.1(7)  | O(23)-W(3)-O(2)    | 100.7(6)  |
| O(25)-W(1)-O(12)   | 101.7(5)   | O(20)-W(2)-O(13)#1 | 99.1(5)   | O(23)-W(3)-O(24)   | 102.8(6)  |
| O(25)-W(1)-O(14)   | 101.9(6)   | O(20)-W(2)-O(12)   | 97.0(5)   | O(23)-W(3)-O(15)   | 102.9(6)  |
| O(25)-W(1)-O(1)    | 172.2(5)   | O(20)-W(2)-O(8)    | 173.8(7)  | O(23)-W(3)-O(1)    | 172.5(5)  |
| O(28)-W(4)-O(18)   | 100.5(7)   | O(11)-W(5)-O(13)   | 99.7(5)   | O(26)-W(6)-O(14)   | 101.2(6)  |
| O(28)-W(4)-O(3)    | 102.7(7)   | O(11)-W(5)-O(3)    | 102.0(7)  | O(26)-W(6)-O(7)    | 101.6(6)  |
| O(28)-W(4)-O(15)   | 98.2(6)    | O(11)-W(5)-O(16)   | 100.3(7)  | O(26)-W(6)-O(4)    | 103.2(6)  |
| O(28)-W(4)-O(17)#1 | 98.0(6)    | O(11)-W(5)-O(5)    | 96.1(5)   | O(26)-W(6)-O(2)    | 101.6(5)  |
| O(28)-W(4)-O(30)   | 172.8(7)   | O(11)-W(5)-O(6)    | 172.4(6)  | O(26)-W(6)-O(1)    | 172.0(5)  |
| O(29)-W(7)-O(10)   | 98.4(6)    | O(31)-W(8)-O(22)   | 102.8(7)  | O(27)-W(9)-O(17)   | 100.1(6)  |
| O(29)-W(7)-O(16)   | 100.0(7)   | O(31)-W(8)-O(10)#1 | 99.5(6)   | O(27)-W(9)-O(21)   | 102.0(7)  |
| O(29)-W(7)-O(22)   | 102.9(7)   | O(31)-W(8)-O(19)   | 99.7(7)   | O(27)-W(9)-O(18)   | 100.3(7)  |
| O(29)-W(7)-O(4)    | 97.8(6)    | O(31)-W(8)-O(7)    | 96.7(6)   | O(27)-W(9)-O(9)    | 95.0(6)   |
| O(29)-W(7)-O(6)    | 172.1(6)   | O(31)-W(8)-O(8)    | 171.8(6)  | O(27)-W(9)-O(30)   | 171.4(6)  |
| N(1)-Cu(1)-N(1)#2  | 179.998(3) | N(1)-Cu(1)-O(32)   | 66.3(15)  | N(1)-Cu(1)-O(32)#2 | 113.7(15) |
| N(2)-Cu(2)-N(2)#3  | 179.996(3) | N(3)-Cu(3)-O(32)   | 95.7(16)  | N(3)-Cu(3)-N(4)    | 179.7(19) |
| N(3)-Cu(3)-O(32)   | 95.7(16)   | N(3)-Cu(3)-N(4)    | 179.3(17) | Cu(3)-O(32)-Cu(1)  | 152(2)    |
| O(8)-P(1)-O(30)    | 111.7(7)   | O(8)-P(1)-O(6)     | 112.2(7)  | O(8)-P(1)-O(1)     | 106.2(6)  |

Symmetry transformations used to generate equivalent atoms: #1 -x,-y,-z; #2 -x+1/2,-y+1/2,-z

**Table S2** Selected bond lengths (Å) and bond angles (°) of compound **2**

|                    |            |                    |          |                    |          |
|--------------------|------------|--------------------|----------|--------------------|----------|
| W(1)-O(32)         | 1.699(6)   | W(2)-O(35)         | 1.698(6) | W(3)-O(15)         | 1.910(5) |
| W(1)-O(13)         | 1.877(5)   | W(2)-O(3)          | 1.896(5) | W(3)-O(2)          | 1.911(5) |
| W(1)-O(3)          | 1.890(5)   | W(2)-O(30)         | 1.901(6) | W(3)-O(30)         | 1.916(6) |
| W(1)-O(23)         | 1.907(6)   | W(2)-O(22)         | 1.907(5) | W(3)-O(20)         | 1.923(2) |
| W(1)-O(12)         | 1.947(5)   | W(2)-O(26)         | 1.932(5) | W(3)-O(25)         | 2.363(5) |
| W(1)-O(28)         | 2.364(5)   | W(2)-O(25)         | 2.391(5) | W(3)-O(37)         | 1.694(6) |
| W(4)-O(33)         | 1.698(6)   | W(5)-O(31)         | 1.693(6) | W(6)-O(36)         | 1.709(8) |
| W(4)-O(2)          | 1.899(5)   | W(5)-O(6)          | 1.882(5) | W(6)-O(16)#1       | 1.885(5) |
| W(4)-O(19)         | 1.8999(19) | W(5)-O(22)         | 1.883(5) | W(6)-O(16)         | 1.885(5) |
| W(4)-O(23)         | 1.905(6)   | W(5)-O(17)         | 1.925(4) | W(6)-O(8)#1        | 1.933(5) |
| W(4)-O(16)         | 1.930(5)   | W(5)-O(24)         | 1.939(5) | W(6)-O(8)          | 1.933(5) |
| W(4)-O(28)         | 2.364(6)   | W(5)-O(27)         | 2.369(6) | W(6)-O(1)          | 2.400(8) |
| W(7)-O(34)         | 1.700(6)   | W(8)-O(29)         | 1.699(8) | W(9)-O(18)         | 1.726(5) |
| W(7)-O(13)         | 1.899(5)   | W(8)-O(15)         | 1.904(6) | W(9)-O(26)         | 1.877(6) |
| W(7)-O(6)          | 1.918(5)   | W(8)-O(15)#1       | 1.904(6) | W(9)-O(24)         | 1.891(5) |
| W(7)-O(21)         | 1.920(3)   | W(8)-O(14)#1       | 1.928(6) | W(9)-O(5)          | 1.909(4) |
| W(7)-O(7)          | 1.961(5)   | W(8)-O(14)         | 1.928(6) | W(9)-O(14)         | 1.914(5) |
| W(7)-O(9)          | 2.378(5)   | W(8)-O(11)         | 2.411(7) | W(9)-O(11)         | 2.345(5) |
| W(10)-O(4)         | 1.731(5)   | W(10)-O(12)        | 1.873(5) | W(10)-O(7)         | 1.895(6) |
| W(10)-O(8)         | 1.900(6)   | W(10)-O(10)        | 1.939(3) | W(10)-O(1)         | 2.368(5) |
| P(2)-O(9)          | 1.519(8)   | P(2)-O(28)         | 1.530(5) | P(2)-O(28)#1       | 1.531(5) |
| P(2)-O(1)          | 1.588(7)   | P(1)-O(27)         | 1.526(8) | P(1)-O(25)#1       | 1.524(6) |
| P(1)-O(25)         | 1.524(5)   | P(1)-O(11)         | 1.585(7) |                    |          |
| Mn(1)-O(18)        | 2.099(6)   | Mn(1)-N(1)         | 2.178(8) | Mn(1)-N(4)         | 2.200(8) |
| Mn(1)-N(2)         | 2.207(7)   | Mn(1)-N(3)         | 2.262(9) | Mn(1)-O(4)#2       | 2.304(6) |
| O(32)-W(1)-O(13)   | 102.3(3)   | O(35)-W(2)-O(3)    | 99.9(3)  | O(37)-W(3)-O(15)   | 97.2(3)  |
| O(32)-W(1)-O(3)    | 98.3(2)    | O(35)-W(2)-O(30)   | 101.0(3) | O(37)-W(3)-O(2)    | 98.8(3)  |
| O(32)-W(1)-O(23)   | 100.2(3)   | O(35)-W(2)-O(22)   | 101.9(3) | O(37)-W(3)-O(30)   | 100.9(3) |
| O(32)-W(1)-O(12)   | 98.4(2)    | O(35)-W(2)-O(26)   | 98.3(3)  | O(37)-W(3)-O(20)   | 100.9(3) |
| O(32)-W(1)-O(28)   | 173.1(3)   | O(35)-W(2)-O(25)   | 174.2(2) | O(37)-W(3)-O(25)   | 174.4(3) |
| O(33)-W(4)-O(2)    | 99.2(3)    | O(31)-W(5)-O(6)    | 99.5(3)  | O(36)-W(6)-O(16)#1 | 102.2(3) |
| O(33)-W(4)-O(19)   | 101.5(3)   | O(31)-W(5)-O(22)   | 103.7(3) | O(36)-W(6)-O(16)   | 102.2(3) |
| O(33)-W(4)-O(23)   | 101.1(3)   | O(31)-W(5)-O(17)   | 98.6(3)  | O(36)-W(6)-O(8)#1  | 102.0(3) |
| O(33)-W(4)-O(16)   | 96.6(3)    | O(31)-W(5)-O(24)   | 96.7(3)  | O(36)-W(6)-O(8)    | 102.0(3) |
| O(33)-W(4)-O(28)   | 173.5(2)   | O(31)-W(5)-O(27)   | 171.0(3) | O(36)-W(6)-O(1)    | 172.4(3) |
| O(34)-W(7)-O(13)   | 103.5(3)   | O(29)-W(8)-O(15)   | 103.1(3) | O(18)-W(9)-O(26)   | 102.7(2) |
| O(34)-W(7)-O(6)    | 98.3(3)    | O(29)-W(8)-O(15)#1 | 103.1(3) | O(18)-W(9)-O(24)   | 102.1(3) |
| O(34)-W(7)-O(21)   | 99.5(3)    | O(29)-W(8)-O(14)#1 | 100.9(3) | O(18)-W(9)-O(5)    | 100.1(3) |
| O(34)-W(7)-O(7)    | 98.0(3)    | O(29)-W(8)-O(14)   | 100.9(3) | O(18)-W(9)-O(14)   | 100.2(2) |
| O(34)-W(7)-O(9)    | 172.4(2)   | O(29)-W(8)-O(11)   | 170.9(4) | O(18)-W(9)-O(11)   | 171.0(2) |
| O(4)-W(10)-O(12)   | 102.5(2)   | O(4)-W(10)-O(7)    | 103.6(3) | O(4)-W(10)-O(8)    | 98.7(2)  |
| O(4)-W(10)-O(10)   | 101.1(3)   | O(4)-W(10)-O(1)    | 170.2(2) |                    |          |
| O(9)-P(2)-O(28)    | 112.1(3)   | O(9)-P(2)-O(28)#1  | 112.1(3) | O(9)-P(2)-O(1)     | 106.9(4) |
| O(27)-P(1)-O(25)#1 | 112.1(3)   | O(27)-P(1)-O(25)   | 112.1(3) | O(27)-P(1)-O(11)   | 106.2(4) |
| O(18)-Mn(1)-N(1)   | 165.1(3)   | O(18)-Mn(1)-N(4)   | 96.5(3)  | O(18)-Mn(1)-N(2)   | 91.2(3)  |
| O(18)-Mn(1)-N(3)   | 94.5(3)    | O(18)-Mn(1)-O(4)#2 | 86.1(2)  |                    |          |

Symmetry transformations used to generate equivalent atoms: #1 -x+2,-y+1,-z+2; #2 -x+2,-y+2,-z+2; #3 x,y+1,z

**Table S3** Selected bond lengths (Å) and bond angles (°) of compound **3**

|                    |            |                    |            |                    |            |
|--------------------|------------|--------------------|------------|--------------------|------------|
| W(1)-O(35)         | 1.696(7)   | W(2)-O(32)         | 1.711(4)   | W(3)-O(20)         | 1.710(5)   |
| W(1)-O(29)         | 1.902(4)   | W(2)-O(28)         | 1.896(5)   | W(3)-O(18)         | 1.900(4)   |
| W(1)-O(29)#1       | 1.902(4)   | W(2)-O(34)         | 1.903(4)   | W(3)-O(21)         | 1.9017(16) |
| W(1)-O(34)#1       | 1.919(5)   | W(2)-O(27)         | 1.910(4)   | W(3)-O(22)         | 1.912(5)   |
| W(1)-O(34)         | 1.919(4)   | W(2)-O(33)         | 1.934(3)   | W(3)-O(29)         | 1.918(4)   |
| W(1)-O(30)         | 2.388(6)   | W(2)-O(30)         | 2.374(4)   | W(3)-O(36)         | 2.353(4)   |
| W(4)-O(23)         | 1.691(5)   | W(5)-O(25)         | 1.700(5)   | W(6)-O(8)          | 1.704(5)   |
| W(4)-O(16)         | 1.896(4)   | W(5)-O(24)         | 1.888(5)   | W(6)-O(15)         | 1.885(4)   |
| W(4)-O(24)         | 1.898(5)   | W(5)-O(19)         | 1.909(4)   | W(6)-O(19)         | 1.887(4)   |
| W(4)-O(22)         | 1.905(5)   | W(5)-O(26)         | 1.920(3)   | W(6)-O(17)         | 1.920(3)   |
| W(4)-O(28)         | 1.926(4)   | W(5)-O(27)         | 1.939(4)   | W(6)-O(7)          | 1.938(4)   |
| W(4)-O(36)         | 2.382(4)   | W(5)-O(31)         | 2.372(4)   | W(6)-O(14)         | 2.354(4)   |
| W(7)-O(9)          | 1.691(5)   | W(8)-O(11)         | 1.698(5)   | W(9)-O(3)          | 1.709(6)   |
| W(7)-O(16)         | 1.891(4)   | W(8)-O(18)         | 1.906(4)   | W(9)-O(4)#1        | 1.893(5)   |
| W(7)-O(10)         | 1.902(5)   | W(8)-O(10)         | 1.916(5)   | W(9)-O(4)          | 1.893(5)   |
| W(7)-O(15)         | 1.906(5)   | W(8)-O(12)         | 1.9184(16) | W(9)-O(2)#1        | 1.920(4)   |
| W(7)-O(6)          | 1.950(4)   | W(8)-O(4)          | 1.923(4)   | W(9)-O(2)          | 1.920(4)   |
| W(7)-O(13)         | 2.390(4)   | W(8)-O(13)         | 2.366(4)   | W(9)-O(5)          | 2.398(6)   |
| W(10)-O(1)         | 1.722(4)   | W(10)-O(6)         | 1.870(4)   | W(10)-O(7)         | 1.890(4)   |
| W(10)-O(2)         | 1.921(4)   | W(10)-O(37)        | 1.921(3)   | W(10)-O(5)         | 2.347(4)   |
| P(2)-O(13)         | 1.526(4)   | P(2)-O(13)#1       | 1.526(4)   | P(2)-O(14)         | 1.538(6)   |
| P(2)-O(5)          | 1.588(6)   | P(1)-O(36)#1       | 1.530(4)   | P(1)-O(36)         | 1.530(4)   |
| P(1)-O(31)         | 1.532(6)   | P(1)-O(30)         | 1.577(6)   |                    |            |
| Cu(1)-N(8)         | 1.981(6)   | Cu(1)-N(6)         | 1.986(6)   | Cu(1)-N(7)         | 2.001(6)   |
| Cu(1)-O(1)         | 2.006(4)   | Cu(1)-N(5)         | 2.175(6)   |                    |            |
| O(35)-W(1)-O(29)   | 102.2(2)   | O(32)-W(2)-O(28)   | 102.8(2)   | O(20)-W(3)-O(18)   | 99.2(2)    |
| O(35)-W(1)-O(29)#1 | 102.2(2)   | O(32)-W(2)-O(34)   | 100.9(2)   | O(20)-W(3)-O(21)   | 101.1(3)   |
| O(35)-W(1)-O(34)#1 | 102.0(2)   | O(32)-W(2)-O(27)   | 102.0(2)   | O(20)-W(3)-O(22)   | 100.7(2)   |
| O(35)-W(1)-O(34)   | 102.0(2)   | O(32)-W(2)-O(33)   | 99.9(2)    | O(20)-W(3)-O(29)   | 96.5(2)    |
| O(35)-W(1)-O(30)   | 172.7(3)   | O(32)-W(2)-O(30)   | 170.78(19) | O(20)-W(3)-O(36)   | 173.7(2)   |
| O(23)-W(4)-O(16)   | 97.9(2)    | O(25)-W(5)-O(24)   | 103.0(2)   | O(8)-W(6)-O(15)    | 103.0(2)   |
| O(23)-W(4)-O(24)   | 102.1(2)   | O(25)-W(5)-O(19)   | 98.4(2)    | O(8)-W(6)-O(19)    | 99.7(2)    |
| O(23)-W(4)-O(22)   | 100.4(2)   | O(25)-W(5)-O(26)   | 99.3(2)    | O(8)-W(6)-O(17)    | 99.1(2)    |
| O(23)-W(4)-O(28)   | 98.6(2)    | O(25)-W(5)-O(27)   | 97.7(2)    | O(8)-W(6)-O(7)     | 96.9(2)    |
| O(23)-W(4)-O(36)   | 173.36(19) | O(25)-W(5)-O(31)   | 172.1(2)   | O(8)-W(6)-O(14)    | 171.1(2)   |
| O(9)-W(7)-O(16)    | 99.5(2)    | O(11)-W(8)-O(18)   | 98.8(2)    | O(3)-W(9)-O(4)#1   | 102.7(2)   |
| O(9)-W(7)-O(10)    | 100.9(2)   | O(11)-W(8)-O(10)   | 100.7(2)   | O(3)-W(9)-O(4)     | 102.7(2)   |
| O(9)-W(7)-O(15)    | 101.4(2)   | O(11)-W(8)-O(12)   | 101.2(3)   | O(3)-W(9)-O(2)#1   | 101.2(2)   |
| O(9)-W(7)-O(6)     | 98.3(2)    | O(11)-W(8)-O(4)    | 97.3(2)    | O(3)-W(9)-O(2)     | 101.2(2)   |
| O(9)-W(7)-O(13)    | 174.1(2)   | O(11)-W(8)-O(13)   | 174.3(2)   | O(3)-W(9)-O(5)     | 171.0(3)   |
| O(1)-W(10)-O(6)    | 102.0(2)   | O(1)-W(10)-O(7)    | 102.7(2)   | O(1)-W(10)-O(2)    | 100.0(2)   |
| O(1)-W(10)-O(37)   | 100.4(2)   | O(1)-W(10)-O(5)    | 170.70(19) |                    |            |
| O(36)#1-P(1)-O(36) | 111.4(3)   | O(36)#1-P(1)-O(31) | 111.7(2)   | O(36)#1-P(1)-O(30) | 107.5(2)   |
| O(13)-P(2)-O(13)#1 | 111.3(4)   | O(13)-P(2)-O(14)   | 112.6(2)   | O(13)-P(2)-O(5)    | 106.9(2)   |
| N(8)-Cu(1)-N(6)    | 175.2(3)   | N(8)-Cu(1)-N(7)    | 81.7(3)    |                    |            |
| N(8)-Cu(1)-N(5)    | 97.8(3)    | N(8)-Cu(1)-O(1)    | 93.3(2)    |                    |            |

Symmetry transformations used to generate equivalent atoms: #1 x,y,z+1; #2 -x,-y+1,-z+2; #3 -x,-y+1,-z+1

**Table S4** Selected bond lengths (Å) and bond angles (°) of compound **4**

|                  |           |                  |           |                  |           |
|------------------|-----------|------------------|-----------|------------------|-----------|
| W(1)-O(45)       | 1.699(7)  | W(2)-O(64)       | 1.694(7)  | W(3)-O(42)       | 1.699(7)  |
| W(1)-O(9)        | 1.903(7)  | W(2)-O(9)        | 1.887(7)  | W(3)-O(57)       | 1.896(7)  |
| W(1)-O(24)       | 1.911(6)  | W(2)-O(34)       | 1.904(6)  | W(3)-O(30)       | 1.906(7)  |
| W(1)-O(54)       | 1.917(6)  | W(2)-O(31)       | 1.927(6)  | W(3)-O(5)        | 1.925(7)  |
| W(1)-O(14)       | 1.936(6)  | W(2)-O(16)       | 1.930(7)  | W(3)-O(19)       | 1.928(7)  |
| W(1)-O(17)       | 2.389(6)  | W(2)-O(12)       | 2.380(6)  | W(3)-O(37)       | 2.355(6)  |
| W(4)-O(59)       | 1.705(7)  | W(5)-O(49)       | 1.878(7)  | W(6)-O(66)       | 1.719(7)  |
| W(4)-O(8)        | 1.870(7)  | W(5)-O(5)        | 1.889(7)  | W(6)-O(51)       | 1.900(7)  |
| W(4)-O(34)       | 1.902(6)  | W(5)-O(21)       | 1.906(6)  | W(6)-O(11)       | 1.908(7)  |
| W(4)-O(57)       | 1.920(7)  | W(5)-O(15)       | 1.958(7)  | W(6)-O(27)       | 1.910(7)  |
| W(4)-O(7)        | 1.963(7)  | W(5)-O(29)       | 2.365(6)  | W(6)-O(18)       | 1.911(6)  |
| W(4)-O(37)       | 2.379(6)  | W(5)-O(3)        | 1.706(7)  | W(6)-O(32)       | 2.367(6)  |
| W(7)-O(40)       | 1.703(7)  | W(8)-O(58)       | 1.704(7)  | W(9)-O(46)       | 1.732(7)  |
| W(7)-O(6)        | 1.883(7)  | W(8)-O(48)       | 1.876(7)  | W(9)-O(39)       | 1.867(7)  |
| W(7)-O(18)       | 1.886(6)  | W(8)-O(56)       | 1.919(7)  | W(9)-O(19)       | 1.906(7)  |
| W(7)-O(31)       | 1.913(6)  | W(8)-O(27)       | 1.930(7)  | W(9)-O(28)       | 1.908(6)  |
| W(7)-O(48)       | 1.937(7)  | W(8)-O(28)       | 1.938(6)  | W(9)-O(10)       | 1.936(7)  |
| W(7)-O(12)       | 2.367(6)  | W(8)-O(25)       | 2.395(6)  | W(9)-O(25)       | 2.376(6)  |
| W(10)-O(61)      | 1.694(8)  | W(11)-O(41)      | 1.728(7)  | W(12)-O(55)      | 1.705(7)  |
| W(10)-O(11)      | 1.892(7)  | W(11)-O(7)       | 1.868(7)  | W(12)-O(24)      | 1.891(6)  |
| W(10)-O(22)      | 1.905(7)  | W(11)-O(16)      | 1.891(7)  | W(12)-O(21)      | 1.901(6)  |
| W(10)-O(52)      | 1.913(7)  | W(11)-O(10)      | 1.925(7)  | W(12)-O(26)      | 1.917(7)  |
| W(10)-O(23)      | 1.939(7)  | W(11)-O(56)      | 1.941(7)  | W(12)-O(8)       | 1.921(7)  |
| W(10)-O(36)      | 2.363(6)  | W(11)-O(25)      | 2.358(6)  | W(12)-O(29)      | 2.385(6)  |
| W(13)-O(67)      | 1.720(8)  | W(14)-O(62)      | 1.729(7)  | W(15)-O(43)      | 1.719(7)  |
| W(13)-O(23)      | 1.892(7)  | W(14)-O(14)      | 1.877(6)  | W(15)-O(22)      | 1.895(7)  |
| W(13)-O(20)      | 1.912(6)  | W(14)-O(35)      | 1.903(7)  | W(15)-O(54)      | 1.905(6)  |
| W(13)-O(38)      | 1.916(7)  | W(14)-O(26)      | 1.915(7)  | W(15)-O(6)       | 1.906(7)  |
| W(13)-O(35)      | 1.939(7)  | W(14)-O(33)      | 1.921(7)  | W(15)-O(20)      | 1.911(6)  |
| W(13)-O(13)      | 2.389(6)  | W(14)-O(13)      | 2.385(6)  | W(15)-O(17)      | 2.361(6)  |
| W(16)-O(63)      | 1.710(7)  | W(17)-O(44)      | 1.708(7)  | W(18)-O(65)      | 1.690(7)  |
| W(16)-O(15)      | 1.867(7)  | W(17)-O(30)      | 1.878(7)  | W(18)-O(52)      | 1.901(7)  |
| W(16)-O(50)      | 1.900(7)  | W(17)-O(4)       | 1.890(7)  | W(18)-O(49)      | 1.911(7)  |
| W(16)-O(38)      | 1.934(7)  | W(17)-O(51)      | 1.916(7)  | W(18)-O(4)       | 1.918(7)  |
| W(16)-O(33)      | 1.936(7)  | W(17)-O(39)      | 1.964(7)  | W(18)-O(50)      | 1.929(7)  |
| W(16)-O(13)      | 2.385(6)  | W(17)-O(32)      | 2.369(6)  | W(18)-O(36)      | 2.391(6)  |
| P(1)-O(12)       | 1.524(7)  | P(1)-O(37)       | 1.531(6)  | P(1)-O(32)       | 1.532(7)  |
| P(1)-O(25)       | 1.584(7)  | P(2)-O(29)       | 1.524(7)  | P(2)-O(36)       | 1.530(6)  |
| P(2)-O(17)       | 1.531(6)  | P(2)-O(13)       | 1.567(7)  |                  |           |
| Cu(1)-O(5W)      | 1.957(8)  | Cu(1)-O(2)       | 1.960(8)  | Cu(1)-N(8)       | 1.968(9)  |
| Cu(1)-N(3)       | 1.998(9)  | Cu(1)-O(62)      | 2.333(7)  | Cu(2)-O(1)       | 1.965(7)  |
| Cu(2)-N(1)       | 1.968(7)  | Cu(2)-N(7)       | 1.992(9)  | Cu(2)-N(6)       | 1.998(9)  |
| Cu(2)-O(46)      | 2.438(7)  | Cu(3)-N(9)       | 1.968(10) | Cu(3)-N(4)       | 1.974(9)  |
| Cu(3)-N(5)       | 2.064(10) | Cu(3)-N(2)       | 2.071(9)  | Cu(3)-Cl(2)      | 2.157(14) |
| Cu(4)-N(12)      | 1.961(11) | Cu(4)-N(13)      | 1.985(11) | Cu(4)-N(11)      | 2.105(11) |
| Cu(4)-N(10)      | 2.138(11) | Cu(4)-Cl(1)      | 2.355(7)  |                  |           |
| O(45)-W(1)-O(9)  | 98.9(3)   | O(64)-W(2)-O(9)  | 98.3(3)   | O(42)-W(3)-O(57) | 99.5(3)   |
| O(45)-W(1)-O(24) | 102.3(3)  | O(64)-W(2)-O(34) | 101.8(3)  | O(42)-W(3)-O(30) | 103.5(3)  |
| O(45)-W(1)-O(54) | 100.5(3)  | O(64)-W(2)-O(31) | 100.6(3)  | O(42)-W(3)-O(5)  | 98.0(3)   |
| O(45)-W(1)-O(14) | 97.1(3)   | O(64)-W(2)-O(16) | 97.4(3)   | O(42)-W(3)-O(19) | 97.7(3)   |
| O(45)-W(1)-O(17) | 172.9(3)  | O(64)-W(2)-O(12) | 173.4(3)  | O(42)-W(3)-O(37) | 172.6(3)  |
| O(59)-W(4)-O(8)  | 99.4(3)   | O(3)-W(5)-O(49)  | 102.5(3)  | O(66)-W(6)-O(51) | 99.7(3)   |
| O(59)-W(4)-O(34) | 102.5(3)  | O(3)-W(5)-O(5)   | 99.3(3)   | O(66)-W(6)-O(11) | 97.7(3)   |
| O(59)-W(4)-O(57) | 99.9(3)   | O(3)-W(5)-O(21)  | 99.9(3)   | O(66)-W(6)-O(27) | 98.2(3)   |
| O(59)-W(4)-O(7)  | 97.6(3)   | O(3)-W(5)-O(15)  | 96.0(3)   | O(66)-W(6)-O(18) | 103.5(3)  |



|                   |          |                   |           |                   |          |
|-------------------|----------|-------------------|-----------|-------------------|----------|
| O(59)-W(4)-O(37)  | 171.9(3) | O(3)-W(5)-O(29)   | 172.0(3)  | O(66)-W(6)-O(32)  | 172.9(3) |
| O(40)-W(7)-O(6)   | 99.1(3)  | O(58)-W(8)-O(48)  | 103.3(3)  | O(46)-W(9)-O(39)  | 102.8(3) |
| O(40)-W(7)-O(18)  | 101.6(3) | O(58)-W(8)-O(56)  | 101.5(3)  | O(46)-W(9)-O(19)  | 104.0(3) |
| O(40)-W(7)-O(31)  | 100.6(3) | O(58)-W(8)-O(27)  | 101.9(3)  | O(46)-W(9)-O(28)  | 98.0(3)  |
| O(40)-W(7)-O(48)  | 97.2(3)  | O(58)-W(8)-O(28)  | 100.5(3)  | O(46)-W(9)-O(10)  | 100.4(3) |
| O(40)-W(7)-O(12)  | 173.8(3) | O(58)-W(8)-O(25)  | 171.1(3)  | O(46)-W(9)-O(25)  | 169.2(3) |
| O(61)-W(10)-O(11) | 99.4(3)  | O(41)-W(11)-O(7)  | 102.2(3)  | O(55)-W(12)-O(24) | 102.8(3) |
| O(61)-W(10)-O(22) | 102.7(3) | O(41)-W(11)-O(16) | 103.1(3)  | O(55)-W(12)-O(21) | 100.7(3) |
| O(61)-W(10)-O(52) | 100.1(3) | O(41)-W(11)-O(10) | 99.0(3)   | O(55)-W(12)-O(26) | 98.8(3)  |
| O(61)-W(10)-O(23) | 97.3(3)  | O(41)-W(11)-O(56) | 99.5(3)   | O(55)-W(12)-O(8)  | 97.3(3)  |
| O(61)-W(10)-O(36) | 173.0(3) | O(41)-W(11)-O(25) | 169.4(3)  | O(55)-W(12)-O(29) | 172.8(3) |
| O(67)-W(13)-O(23) | 102.8(3) | O(62)-W(14)-O(14) | 102.9(3)  | O(43)-W(15)-O(22) | 102.4(3) |
| O(67)-W(13)-O(20) | 103.2(3) | O(62)-W(14)-O(35) | 99.6(3)   | O(43)-W(15)-O(54) | 100.0(3) |
| O(67)-W(13)-O(38) | 100.1(3) | O(62)-W(14)-O(26) | 102.9(3)  | O(43)-W(15)-O(6)  | 98.0(3)  |
| O(67)-W(13)-O(35) | 100.1(3) | O(62)-W(14)-O(33) | 100.5(3)  | O(43)-W(15)-O(20) | 98.1(3)  |
| O(67)-W(13)-O(13) | 169.9(3) | O(62)-W(14)-O(13) | 170.5(3)  | O(43)-W(15)-O(17) | 173.5(3) |
| O(63)-W(16)-O(15) | 102.7(3) | O(44)-W(17)-O(30) | 102.2(3)  | O(65)-W(18)-O(52) | 101.2(3) |
| O(63)-W(16)-O(50) | 103.8(3) | O(44)-W(17)-O(4)  | 99.2(3)   | O(65)-W(18)-O(49) | 102.2(3) |
| O(63)-W(16)-O(38) | 101.0(3) | O(44)-W(17)-O(51) | 100.3(3)  | O(65)-W(18)-O(4)  | 98.5(3)  |
| O(63)-W(16)-O(33) | 98.5(3)  | O(44)-W(17)-O(39) | 96.7(3)   | O(65)-W(18)-O(50) | 97.0(3)  |
| O(63)-W(16)-O(13) | 169.2(3) | O(44)-W(17)-O(32) | 172.6(3)  | O(65)-W(18)-O(36) | 173.9(3) |
| O(5W)-Cu(1)-O(2)  | 92.2(3)  | O(5W)-Cu(1)-N(8)  | 168.8(4)  | O(5W)-Cu(1)-N(3)  | 93.3(3)  |
| O(5W)-Cu(1)-O(62) | 90.8(3)  | O(1)-Cu(2)-N(1)   | 83.0(3)   | O(1)-Cu(2)-N(7)   | 94.3(3)  |
| O(1)-Cu(2)-N(6)   | 174.0(4) | O(1)-Cu(2)-O(46)  | 92.3(3)   | N(9)-Cu(3)-N(4)   | 176.2(4) |
| N(9)-Cu(3)-N(5)   | 82.1(4)  | N(9)-Cu(3)-N(2)   | 97.4(4)   | N(9)-Cu(3)-Cl(2)  | 89.6(5)  |
| N(12)-Cu(4)-N(13) | 168.3(5) | N(12)-Cu(4)-N(11) | 79.8(4)   | N(12)-Cu(4)-N(10) | 94.4(4)  |
| N(12)-Cu(4)-Cl(1) | 93.8(4)  | O(6W)-Sr(2)-O(9W) | 140.40(9) |                   |          |
| O(12)-P(1)-O(37)  | 112.9(4) | O(12)-P(1)-O(32)  | 112.1(4)  | O(12)-P(1)-O(25)  | 106.4(4) |
| O(29)-P(2)-O(36)  | 111.9(4) | O(29)-P(2)-O(17)  | 111.9(4)  | O(29)-P(2)-O(13)  | 107.5(4) |

Symmetry transformations used to generate equivalent atoms: #1 -x+2,-y+1,-z+1; #2 x,-y+1/2,z-1/2; #3 -x+1,-y+1,-z+1

**Table S5** Selected bond lengths (Å) and bond angles (°) of compound **5**

|             |          |             |          |             |          |
|-------------|----------|-------------|----------|-------------|----------|
| W(1)-O(51)  | 1.707(4) | W(2)-O(54)  | 1.697(4) | W(3)-O(56)  | 1.704(4) |
| W(1)-O(16)  | 1.873(3) | W(2)-O(18)  | 1.891(3) | W(3)-O(9)   | 1.879(3) |
| W(1)-O(55)  | 1.908(4) | W(2)-O(7)   | 1.895(3) | W(3)-O(40)  | 1.892(4) |
| W(1)-O(11)  | 1.914(4) | W(2)-O(50)  | 1.909(4) | W(3)-O(45)  | 1.925(4) |
| W(1)-O(29)  | 1.950(3) | W(2)-O(44)  | 1.933(3) | W(3)-O(17)  | 1.941(3) |
| W(1)-O(39)  | 2.342(3) | W(2)-O(1)   | 2.366(3) | W(3)-O(10)  | 2.388(3) |
| W(4)-O(61)  | 1.705(4) | W(5)-O(32)  | 1.707(4) | W(6)-O(59)  | 1.706(4) |
| W(4)-O(30)  | 1.892(3) | W(5)-O(8)   | 1.877(3) | W(6)-O(12)  | 1.901(4) |
| W(4)-O(60)  | 1.897(3) | W(5)-O(21)  | 1.896(3) | W(6)-O(27)  | 1.909(3) |
| W(4)-O(55)  | 1.910(4) | W(5)-O(6)   | 1.898(3) | W(6)-O(23)  | 1.910(4) |
| W(4)-O(3)   | 1.926(3) | W(5)-O(5)   | 1.952(3) | W(6)-O(43)  | 1.921(3) |
| W(4)-O(39)  | 2.381(3) | W(5)-O(20)  | 2.368(3) | W(6)-O(31)  | 2.370(3) |
| W(7)-O(47)  | 1.710(4) | W(8)-O(62)  | 1.716(4) | W(9)-O(25)  | 1.694(4) |
| W(7)-O(22)  | 1.882(4) | W(8)-O(29)  | 1.871(4) | W(9)-O(3)   | 1.857(3) |
| W(7)-O(17)  | 1.884(3) | W(8)-O(34)  | 1.913(4) | W(9)-O(13)  | 1.906(3) |
| W(7)-O(21)  | 1.922(3) | W(8)-O(14)  | 1.921(4) | W(9)-O(18)  | 1.909(3) |
| W(7)-O(2)   | 1.945(3) | W(8)-O(53)  | 1.920(4) | W(9)-O(48)  | 1.985(3) |
| W(7)-O(20)  | 2.370(3) | W(8)-O(26)  | 2.407(3) | W(9)-O(42)  | 2.371(3) |
| W(10)-O(52) | 1.696(4) | W(11)-O(49) | 1.706(4) | W(12)-O(38) | 1.705(4) |
| W(10)-O(7)  | 1.887(3) | W(11)-O(4)  | 1.870(3) | W(12)-O(6)  | 1.904(4) |
| W(10)-O(23) | 1.903(4) | W(11)-O(27) | 1.905(3) | W(12)-O(15) | 1.907(3) |
| W(10)-O(30) | 1.904(3) | W(11)-O(53) | 1.911(4) | W(12)-O(13) | 1.907(4) |
| W(10)-O(57) | 1.949(3) | W(11)-O(41) | 1.976(4) | W(12)-O(16) | 1.926(3) |

|                   |            |                   |            |                   |            |
|-------------------|------------|-------------------|------------|-------------------|------------|
| W(10)-O(31)       | 2.362(3)   | W(11)-O(26)       | 2.400(3)   | W(12)-O(42)       | 2.365(3)   |
| W(13)-O(58)       | 1.707(4)   | W(14)-O(24)       | 1.736(3)   | W(15)-O(37)       | 1.735(3)   |
| W(13)-O(43)       | 1.882(3)   | W(14)-O(48)       | 1.847(3)   | W(15)-O(41)       | 1.875(4)   |
| W(13)-O(50)       | 1.901(4)   | W(14)-O(44)       | 1.887(3)   | W(15)-O(57)       | 1.886(3)   |
| W(13)-O(22)       | 1.908(4)   | W(14)-O(33)       | 1.910(3)   | W(15)-O(34)       | 1.928(4)   |
| W(13)-O(9)        | 1.946(3)   | W(14)-O(40)       | 1.950(3)   | W(15)-O(60)       | 1.932(3)   |
| W(13)-O(1)        | 2.363(3)   | W(14)-O(10)       | 2.335(3)   | W(15)-O(26)       | 2.354(3)   |
| W(16)-O(35)       | 1.709(4)   | W(17)-O(36)       | 1.712(4)   | W(18)-O(46)       | 1.702(4)   |
| W(16)-O(11)       | 1.875(4)   | W(17)-O(2)        | 1.866(3)   | W(18)-O(5)        | 1.887(3)   |
| W(16)-O(14)       | 1.907(3)   | W(17)-O(19)       | 1.890(3)   | W(18)-O(45)       | 1.904(4)   |
| W(16)-O(19)       | 1.923(3)   | W(17)-O(12)       | 1.906(4)   | W(18)-O(15)       | 1.909(3)   |
| W(16)-O(8)        | 1.926(3)   | W(17)-O(4)        | 1.972(3)   | W(18)-O(33)       | 1.960(3)   |
| W(16)-O(28)       | 2.359(3)   | W(17)-O(28)       | 2.374(3)   | W(18)-O(10)       | 2.419(3)   |
| P(1)-O(39)        | 1.523(4)   | P(1)-O(31)        | 1.531(3)   | P(1)-O(28)        | 1.534(4)   |
| P(1)-O(26)        | 1.568(3)   | P(2)-O(20)        | 1.525(4)   | P(2)-O(42)        | 1.533(3)   |
| P(2)-O(10)        | 1.574(3)   | P(2)-O(1)         | 1.524(3)   |                   |            |
| Mn(1)-O(5W)       | 2.133(4)   | Mn(2)-O(37)       | 2.183(4)   | Mn(3)-N(13)       | 2.215(5)   |
| Mn(1)-O(24)       | 2.196(4)   | Mn(2)-O(6W)       | 2.185(4)   | Mn(3)-N(7)        | 2.220(5)   |
| Mn(1)-N(1)        | 2.263(5)   | Mn(2)-N(9)        | 2.269(5)   | Mn(3)-N(14)       | 2.227(5)   |
| Mn(1)-N(4)        | 2.274(5)   | Mn(2)-N(11)       | 2.270(5)   | Mn(3)-N(12)       | 2.293(5)   |
| Mn(1)-N(3)        | 2.274(5)   | Mn(2)-N(10)       | 2.283(5)   | Mn(3)-N(6)        | 2.239(5)   |
| Mn(1)-N(2)        | 2.275(4)   | Mn(2)-N(8)        | 2.297(4)   | Mn(3)-N(5)        | 2.303(6)   |
| O(51)-W(1)-O(16)  | 98.53(17)  | O(54)-W(2)-O(18)  | 101.75(17) | O(1)-Mo(3)-O(9)   | 98.70(10)  |
| O(51)-W(1)-O(55)  | 99.16(17)  | O(54)-W(2)-O(7)   | 99.66(16)  | O(12)-Mo(3)-O(9)  | 154.55(8)  |
| O(51)-W(1)-O(29)  | 96.83(16)  | O(54)-W(2)-O(50)  | 100.56(17) | O(11)-Mo(3)-O(9)  | 86.06(8)   |
| O(51)-W(1)-O(11)  | 102.29(17) | O(54)-W(2)-O(44)  | 96.88(16)  | O(22)-Mo(3)-O(9)  | 84.90(9)   |
| O(51)-W(1)-O(39)  | 173.02(16) | O(54)-W(2)-O(1)   | 173.44(15) | O(9)-Mo(3)-O(8)   | 72.18(8)   |
| O(61)-W(4)-O(30)  | 102.09(17) | O(32)-W(5)-O(8)   | 98.57(17)  | O(59)-W(6)-O(12)  | 101.37(17) |
| O(61)-W(4)-O(60)  | 98.64(16)  | O(32)-W(5)-O(21)  | 100.57(16) | O(59)-W(6)-O(27)  | 97.95(16)  |
| O(61)-W(4)-O(55)  | 100.79(17) | O(32)-W(5)-O(6)   | 102.07(16) | O(59)-W(6)-O(23)  | 101.29(17) |
| O(61)-W(4)-O(3)   | 98.81(16)  | O(32)-W(5)-O(5)   | 96.85(16)  | O(59)-W(6)-O(43)  | 98.49(16)  |
| O(61)-W(4)-O(39)  | 173.93(16) | O(32)-W(5)-O(20)  | 173.65(15) | O(59)-W(6)-O(31)  | 174.32(16) |
| O(47)-W(7)-O(22)  | 102.89(17) | O(62)-W(8)-O(29)  | 103.41(17) | O(25)-W(9)-O(3)   | 99.30(16)  |
| O(47)-W(7)-O(17)  | 99.50(16)  | O(62)-W(8)-O(34)  | 104.08(17) | O(25)-W(9)-O(13)  | 100.14(17) |
| O(47)-W(7)-O(21)  | 99.61(17)  | O(62)-W(8)-O(14)  | 99.86(17)  | O(25)-W(9)-O(18)  | 102.48(17) |
| O(47)-W(7)-O(2)   | 97.72(16)  | O(62)-W(8)-O(53)  | 101.07(17) | O(25)-W(9)-O(48)  | 96.67(16)  |
| O(47)-W(7)-O(20)  | 172.17(15) | O(62)-W(8)-O(26)  | 172.19(15) | O(25)-W(9)-O(42)  | 172.55(15) |
| O(52)-W(10)-O(7)  | 98.83(16)  | O(49)-W(11)-O(4)  | 101.92(17) | O(38)-W(12)-O(6)  | 100.45(16) |
| O(52)-W(10)-O(23) | 99.51(17)  | O(49)-W(11)-O(27) | 103.68(17) | O(38)-W(12)-O(15) | 98.45(16)  |
| O(52)-W(10)-O(30) | 102.65(17) | O(49)-W(11)-O(53) | 100.40(17) | O(38)-W(12)-O(13) | 102.01(17) |
| O(52)-W(10)-O(57) | 96.96(16)  | O(49)-W(11)-O(26) | 169.93(15) | O(38)-W(12)-O(16) | 97.93(16)  |
| O(52)-W(10)-O(31) | 172.65(15) | O(49)-W(11)-O(41) | 100.40(17) | O(38)-W(12)-O(42) | 175.18(15) |
| O(58)-W(13)-O(43) | 99.27(17)  | O(24)-W(14)-O(48) | 101.38(16) | O(37)-W(15)-O(41) | 102.39(16) |
| O(58)-W(13)-O(50) | 99.54(17)  | O(24)-W(14)-O(44) | 101.92(16) | O(37)-W(15)-O(57) | 101.36(16) |
| O(58)-W(13)-O(22) | 102.42(17) | O(24)-W(14)-O(33) | 100.47(15) | O(37)-W(15)-O(34) | 101.63(16) |
| O(58)-W(13)-O(9)  | 97.58(17)  | O(24)-W(14)-O(40) | 100.47(16) | O(37)-W(15)-O(60) | 100.41(16) |
| O(58)-W(13)-O(1)  | 172.66(16) | O(24)-W(14)-O(10) | 171.82(14) | O(37)-W(15)-O(26) | 174.06(14) |
| O(11)-W(16)-O(14) | 87.11(15)  | O(36)-W(17)-O(2)  | 99.53(16)  | O(46)-W(18)-O(5)  | 102.59(17) |
| O(11)-W(16)-O(19) | 157.30(15) | O(36)-W(17)-O(19) | 100.39(16) | O(46)-W(18)-O(45) | 101.50(17) |
| O(11)-W(16)-O(8)  | 88.67(15)  | O(36)-W(17)-O(12) | 102.35(17) | O(46)-W(18)-O(15) | 103.72(17) |
| O(11)-W(16)-O(28) | 84.27(13)  | O(36)-W(17)-O(4)  | 96.15(16)  | O(46)-W(18)-O(33) | 100.59(17) |
| O(35)-W(16)-O(11) | 102.73(17) | O(36)-W(17)-O(28) | 172.95(15) | O(46)-W(18)-O(10) | 170.02(15) |
| O(5W)-Mn(1)-O(24) | 82.39(15)  | O(37)-Mn(2)-O(6W) | 82.12(15)  | N(13)-Mn(3)-N(7)  | 89.6(2)    |
| O(5W)-Mn(1)-N(1)  | 102.66(19) | O(37)-Mn(2)-N(9)  | 91.82(15)  | N(13)-Mn(3)-N(14) | 162.6(2)   |
| O(5W)-Mn(1)-N(4)  | 158.42(19) | O(37)-Mn(2)-N(11) | 110.71(16) | N(13)-Mn(3)-N(6)  | 94.00(19)  |
| O(5W)-Mn(1)-N(3)  | 92.76(19)  | O(37)-Mn(2)-N(10) | 93.05(15)  | N(13)-Mn(3)-N(12) | 106.4(2)   |
| O(5W)-Mn(1)-N(2)  | 89.11(17)  | O(37)-Mn(2)-N(8)  | 159.67(16) | N(13)-Mn(3)-N(5)  | 73.8(2)    |

|                  |            |                  |            |                  |            |
|------------------|------------|------------------|------------|------------------|------------|
| O(39)-P(1)-O(31) | 111.8(2)   | O(39)-P(1)-O(28) | 111.7(2)   | O(39)-P(1)-O(26) | 106.61(19) |
| O(1)-P(2)-O(20)  | 111.63(19) | O(1)-P(2)-O(42)  | 111.75(19) | O(1)-P(2)-O(10)  | 107.07(18) |

Symmetry transformations used to generate equivalent atoms: #1 -x+2,-y+1,-z+1; #2 x,-y+1/2,z-1/2; #3 -x+1,-y+1,-z+1

**Table S6** Selected bond lengths (Å) and bond angles (°) of compound **6**

|                  |           |                  |           |                  |           |
|------------------|-----------|------------------|-----------|------------------|-----------|
| W(1)-O(49)       | 1.701(9)  | W(2)-O(24)       | 1.708(9)  | W(3)-O(56)       | 1.688(9)  |
| W(1)-O(3)        | 1.888(9)  | W(2)-O(20)       | 1.862(9)  | W(3)-O(10)       | 1.896(9)  |
| W(1)-O(9)        | 1.893(8)  | W(2)-O(15)       | 1.889(9)  | W(3)-O(17)       | 1.908(9)  |
| W(1)-O(5)        | 1.908(9)  | W(2)-O(54)       | 1.927(9)  | W(3)-O(9)        | 1.910(8)  |
| W(1)-O(4)        | 1.935(9)  | W(2)-O(30)       | 1.955(9)  | W(3)-O(41)       | 1.920(9)  |
| W(1)-O(29)       | 2.378(9)  | W(2)-O(22)       | 2.354(9)  | W(3)-O(35)       | 2.373(9)  |
| W(4)-O(28)       | 1.703(9)  | W(5)-O(25)       | 1.701(10) | W(6)-O(34)       | 1.699(9)  |
| W(4)-O(2)        | 1.891(9)  | W(5)-O(13)       | 1.885(8)  | W(6)-O(19)       | 1.896(9)  |
| W(4)-O(16)       | 1.907(10) | W(5)-O(15)       | 1.908(9)  | W(6)-O(8)        | 1.900(9)  |
| W(4)-O(58)       | 1.923(9)  | W(5)-O(17)       | 1.909(9)  | W(6)-O(40)       | 1.929(9)  |
| W(4)-O(43)       | 1.923(9)  | W(5)-O(12)       | 1.958(8)  | W(6)-O(21)       | 2.416(8)  |
| W(4)-O(38)       | 2.387(9)  | W(5)-O(35)       | 2.345(9)  | W(6)-O(74)       | 1.917(9)  |
| W(7)-O(53)       | 1.721(10) | W(8)-O(31)       | 1.689(9)  | W(9)-O(59)       | 1.705(10) |
| W(7)-O(14)       | 1.887(9)  | W(8)-O(3)        | 1.902(9)  | W(9)-O(5)        | 1.875(9)  |
| W(7)-O(10)       | 1.897(9)  | W(8)-O(13)       | 1.914(9)  | W(9)-O(68)       | 1.878(9)  |
| W(7)-O(18)       | 1.916(9)  | W(8)-O(23)       | 1.915(9)  | W(9)-O(14)       | 1.904(9)  |
| W(7)-O(21)       | 2.333(9)  | W(8)-O(6)        | 1.932(9)  | W(9)-O(44)       | 1.910(9)  |
| W(7)-O(74)       | 1.889(9)  | W(8)-O(29)       | 2.350(9)  | W(9)-O(32)       | 2.307(9)  |
| W(10)-O(51)      | 1.698(9)  | W(11)-O(45)      | 1.697(9)  | W(12)-O(60)      | 1.717(10) |
| W(10)-O(8)       | 1.893(9)  | W(11)-O(43)      | 1.858(10) | W(12)-O(41)      | 1.900(9)  |
| W(10)-O(7)       | 1.905(9)  | W(11)-O(19)      | 1.898(9)  | W(12)-O(18)      | 1.907(10) |
| W(10)-O(2)       | 1.909(9)  | W(11)-O(44)      | 1.922(10) | W(12)-O(26)      | 1.921(10) |
| W(10)-O(54)      | 1.913(9)  | W(11)-O(36)      | 1.928(9)  | W(12)-O(47)      | 1.933(9)  |
| W(10)-O(22)      | 2.391(8)  | W(11)-O(32)      | 2.371(9)  | W(12)-O(11)      | 2.405(8)  |
| W(13)-O(50)      | 1.678(9)  | W(14)-O(57)      | 1.697(9)  | W(15)-O(55)      | 1.683(9)  |
| W(13)-O(40)      | 1.885(9)  | W(14)-O(33)      | 1.893(10) | W(15)-O(23)      | 1.874(9)  |
| W(13)-O(47)      | 1.911(10) | W(14)-O(58)      | 1.899(10) | W(15)-O(39)      | 1.891(9)  |
| W(13)-O(7)       | 1.926(9)  | W(14)-O(36)      | 1.900(9)  | W(15)-O(16)      | 1.907(9)  |
| W(13)-O(48)      | 1.947(10) | W(14)-O(42)      | 1.933(9)  | W(15)-O(20)      | 1.936(9)  |
| W(13)-O(11)      | 2.390(8)  | W(14)-O(1)       | 2.371(8)  | W(15)-O(38)      | 2.369(9)  |
| W(16)-O(63)      | 1.727(10) | W(17)-O(52)      | 1.701(9)  | W(18)-O(62)      | 1.691(10) |
| W(16)-O(12)      | 1.875(9)  | W(17)-O(4)       | 1.888(9)  | W(18)-O(6)       | 1.898(9)  |
| W(16)-O(30)      | 1.882(9)  | W(17)-O(46)      | 1.921(10) | W(18)-O(46)      | 1.917(9)  |
| W(16)-O(48)      | 1.901(9)  | W(17)-O(42)      | 1.929(9)  | W(18)-O(39)      | 1.930(9)  |
| W(16)-O(26)      | 1.944(10) | W(17)-O(68)      | 1.946(10) | W(18)-O(33)      | 1.942(9)  |
| W(16)-O(11)      | 2.332(8)  | W(17)-O(1)       | 2.381(9)  | W(18)-O(1)       | 2.398(9)  |
| Mn(1)-O(9W)      | 2.109(13) | Mn(1)-O(59)      | 2.150(10) | Mn(1)-O(10W)     | 2.169(15) |
| Mn(1)-N(14)      | 2.218(13) | Mn(1)-N(2)       | 2.226(14) | Mn(1)-O(8W)      | 2.250(11) |
| Mn(2)-N(10)      | 2.236(14) | Mn(2)-N(6)       | 2.240(13) | Mn(2)-N(3)       | 2.243(14) |
| Mn(2)-N(8)       | 2.257(13) | Mn(2)-N(4)       | 2.257(11) | Mn(2)-N(9)       | 2.270(12) |
| P(1)-O(38)       | 1.521(9)  | P(1)-O(32)       | 1.535(9)  | P(1)-O(29)       | 1.541(9)  |
| P(1)-O(1)        | 1.579(8)  | P(2)-O(22)       | 1.513(9)  | P(2)-O(21)       | 1.518(9)  |
| P(2)-O(35)       | 1.532(8)  | P(2)-O(11)       | 1.590(8)  |                  |           |
| O(49)-W(1)-O(3)  | 103.2(4)  | O(24)-W(2)-O(20) | 99.0(4)   | O(56)-W(3)-O(10) | 102.8(5)  |
| O(49)-W(1)-O(9)  | 99.6(4)   | O(24)-W(2)-O(15) | 100.9(4)  | O(56)-W(3)-O(17) | 100.8(4)  |
| O(49)-W(1)-O(5)  | 101.5(4)  | O(24)-W(2)-O(54) | 100.4(4)  | O(56)-W(3)-O(9)  | 99.2(4)   |
| O(49)-W(1)-O(4)  | 96.8(4)   | O(24)-W(2)-O(30) | 97.6(4)   | O(56)-W(3)-O(41) | 96.8(4)   |
| O(49)-W(1)-O(29) | 175.6(4)  | O(24)-W(2)-O(22) | 174.0(4)  | O(56)-W(3)-O(35) | 173.6(4)  |
| O(28)-W(4)-O(2)  | 100.1(4)  | O(25)-W(5)-O(13) | 98.3(4)   | O(34)-W(6)-O(19) | 99.6(4)   |
| O(28)-W(4)-O(16) | 100.4(4)  | O(25)-W(5)-O(15) | 103.3(4)  | O(34)-W(6)-O(8)  | 101.2(4)  |

|                    |          |                   |          |                   |          |
|--------------------|----------|-------------------|----------|-------------------|----------|
| O(28)-W(4)-O(58)   | 96.4(4)  | O(25)-W(5)-O(17)  | 98.5(4)  | O(34)-W(6)-O(74)  | 102.4(4) |
| O(28)-W(4)-O(43)   | 102.1(4) | O(25)-W(5)-O(12)  | 98.4(4)  | O(34)-W(6)-O(40)  | 97.1(4)  |
| O(28)-W(4)-O(38)   | 172.8(4) | O(25)-W(5)-O(35)  | 172.3(4) | O(34)-W(6)-O(21)  | 173.7(4) |
| O(53)-W(7)-O(14)   | 97.4(4)  | O(31)-W(8)-O(3)   | 100.1(4) | O(59)-W(9)-O(5)   | 100.8(4) |
| O(53)-W(7)-O(74)   | 100.7(4) | O(31)-W(8)-O(13)  | 98.2(4)  | O(59)-W(9)-O(68)  | 97.2(4)  |
| O(53)-W(7)-O(10)   | 101.4(4) | O(31)-W(8)-O(23)  | 103.3(4) | O(59)-W(9)-O(14)  | 98.5(4)  |
| O(53)-W(7)-O(18)   | 97.5(4)  | O(31)-W(8)-O(6)   | 96.7(4)  | O(59)-W(9)-O(44)  | 100.5(4) |
| O(53)-W(7)-O(21)   | 174.8(4) | O(31)-W(8)-O(29)  | 173.2(4) | O(59)-W(9)-O(32)  | 174.5(4) |
| O(51)-W(10)-O(8)   | 102.3(4) | O(45)-W(11)-O(43) | 103.9(4) | O(60)-W(12)-O(41) | 102.0(4) |
| O(51)-W(10)-O(7)   | 98.7(4)  | O(45)-W(11)-O(19) | 98.8(4)  | O(60)-W(12)-O(18) | 102.6(5) |
| O(51)-W(10)-O(2)   | 97.8(4)  | O(45)-W(11)-O(44) | 98.7(4)  | O(60)-W(12)-O(26) | 101.1(5) |
| O(51)-W(10)-O(54)  | 99.9(5)  | O(45)-W(11)-O(36) | 98.0(4)  | O(60)-W(12)-O(47) | 102.1(4) |
| O(51)-W(10)-O(22)  | 173.3(4) | O(45)-W(11)-O(32) | 171.0(4) | O(60)-W(12)-O(11) | 171.3(4) |
| O(50)-W(13)-O(40)  | 103.5(4) | O(57)-W(14)-O(33) | 100.7(4) | O(55)-W(15)-O(23) | 101.2(4) |
| O(50)-W(13)-O(47)  | 101.7(4) | O(57)-W(14)-O(58) | 103.5(5) | O(55)-W(15)-O(39) | 97.2(4)  |
| O(50)-W(13)-O(7)   | 102.5(4) | O(57)-W(14)-O(36) | 102.1(4) | O(55)-W(15)-O(16) | 101.7(4) |
| O(50)-W(13)-O(48)  | 100.0(4) | O(57)-W(14)-O(42) | 100.6(5) | O(55)-W(15)-O(20) | 97.3(4)  |
| O(50)-W(13)-O(11)  | 170.4(4) | O(57)-W(14)-O(1)  | 171.8(4) | O(55)-W(15)-O(38) | 175.7(4) |
| O(63)-W(16)-O(12)  | 101.6(4) | O(52)-W(17)-O(4)  | 101.6(4) | O(62)-W(18)-O(6)  | 102.1(4) |
| O(63)-W(16)-O(30)  | 103.1(4) | O(52)-W(17)-O(46) | 102.2(4) | O(62)-W(18)-O(46) | 102.3(5) |
| O(63)-W(16)-O(48)  | 100.5(4) | O(52)-W(17)-O(42) | 101.2(4) | O(62)-W(18)-O(39) | 100.6(5) |
| O(63)-W(16)-O(26)  | 99.5(4)  | O(52)-W(17)-O(68) | 100.3(4) | O(62)-W(18)-O(33) | 102.7(4) |
| O(63)-W(16)-O(11)  | 171.1(4) | O(52)-W(17)-O(1)  | 173.6(4) | O(62)-W(18)-O(1)  | 173.5(4) |
| N(10)-Mn(2)-N(6)   | 74.6(5)  | N(10)-Mn(2)-N(3)  | 162.9(4) | N(10)-Mn(2)-N(8)  | 93.4(5)  |
| N(10)-Mn(2)-N(4)   | 103.9(4) | N(10)-Mn(2)-N(9)  | 99.8(5)  | O(9W)-Mn(1)-O(59) | 93.3(5)  |
| O(9W)-Mn(1)-O(10W) | 91.4(7)  | O(9W)-Mn(1)-N(14) | 98.0(5)  |                   |          |
| O(9W)-Mn(1)-O(8W)  | 84.4(6)  | O(9W)-Mn(1)-N(2)  | 171.6(6) |                   |          |
| O(38)-P(1)-O(32)   | 112.0(5) | O(38)-P(1)-O(29)  | 111.1(5) | O(38)-P(1)-O(1)   | 107.0(5) |
| O(22)-P(2)-O(21)   | 112.6(5) | O(22)-P(2)-O(35)  | 112.7(5) | O(22)-P(2)-O(11)  | 106.2(5) |

Symmetry transformations used to generate equivalent atoms: #1 -x+2,-y+1,-z+1; #2 x,-y+1/2,z-1/2; #3 -x+1,-y+1,-z+1

### 3. Physical characterization

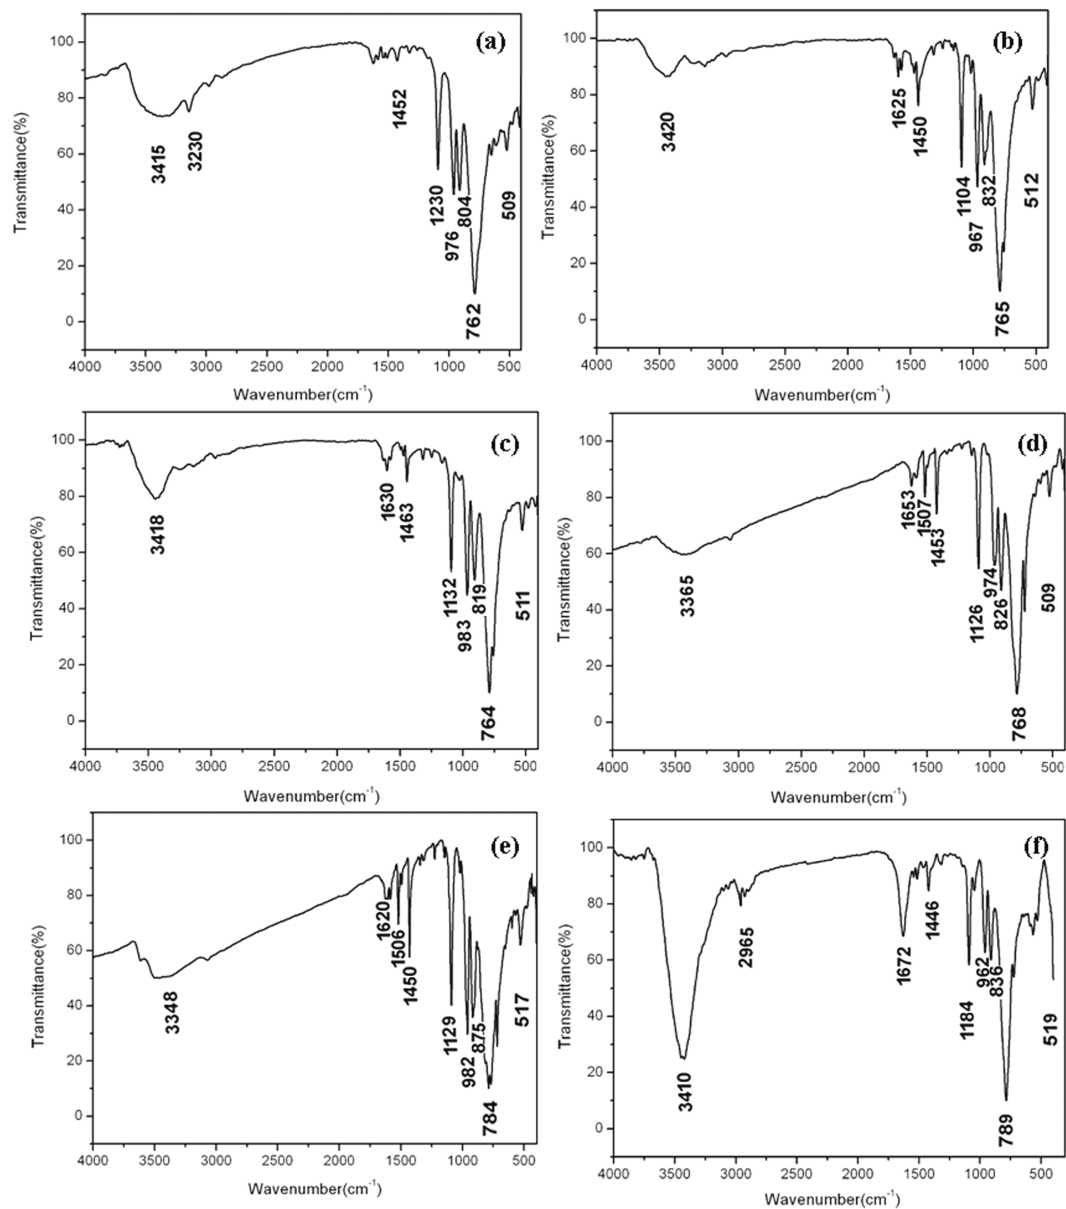

**Fig. S11** IR spectra of **(a)** compound **1**, **(b)** compound **2**, **(c)** compound **3**, **(d)** compound **4**, **(e)** compound **5**, and **(f)** compound **6**.

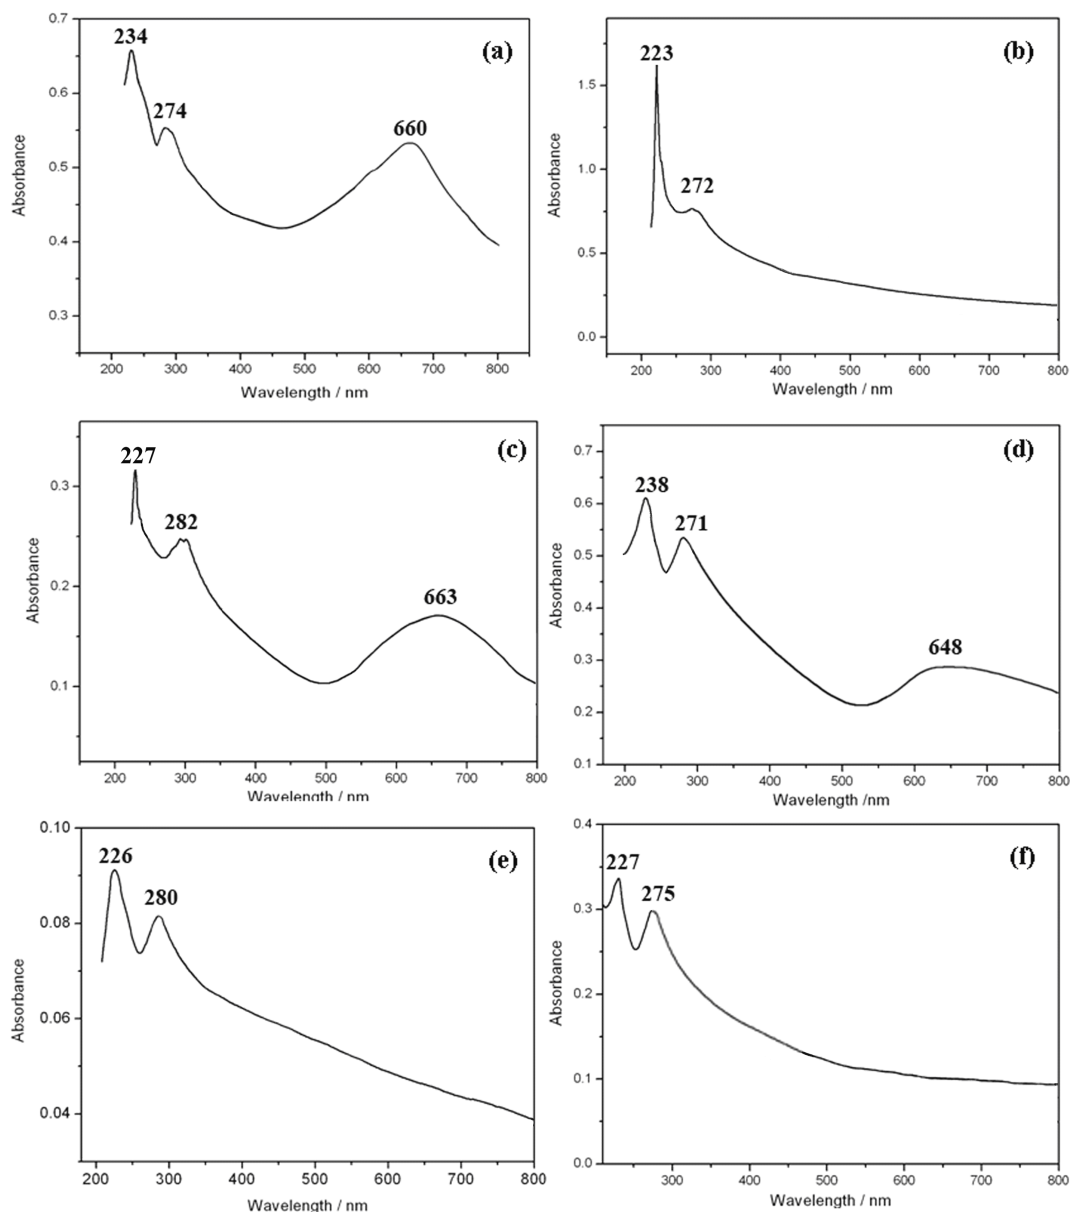

**Fig. S12** UV spectra of **(a)** compound **1**, **(b)** compound **2**, **(c)** compound **3**, **(d)** compound **4**, **(e)** compound **5**, and **(f)** compound **6**.

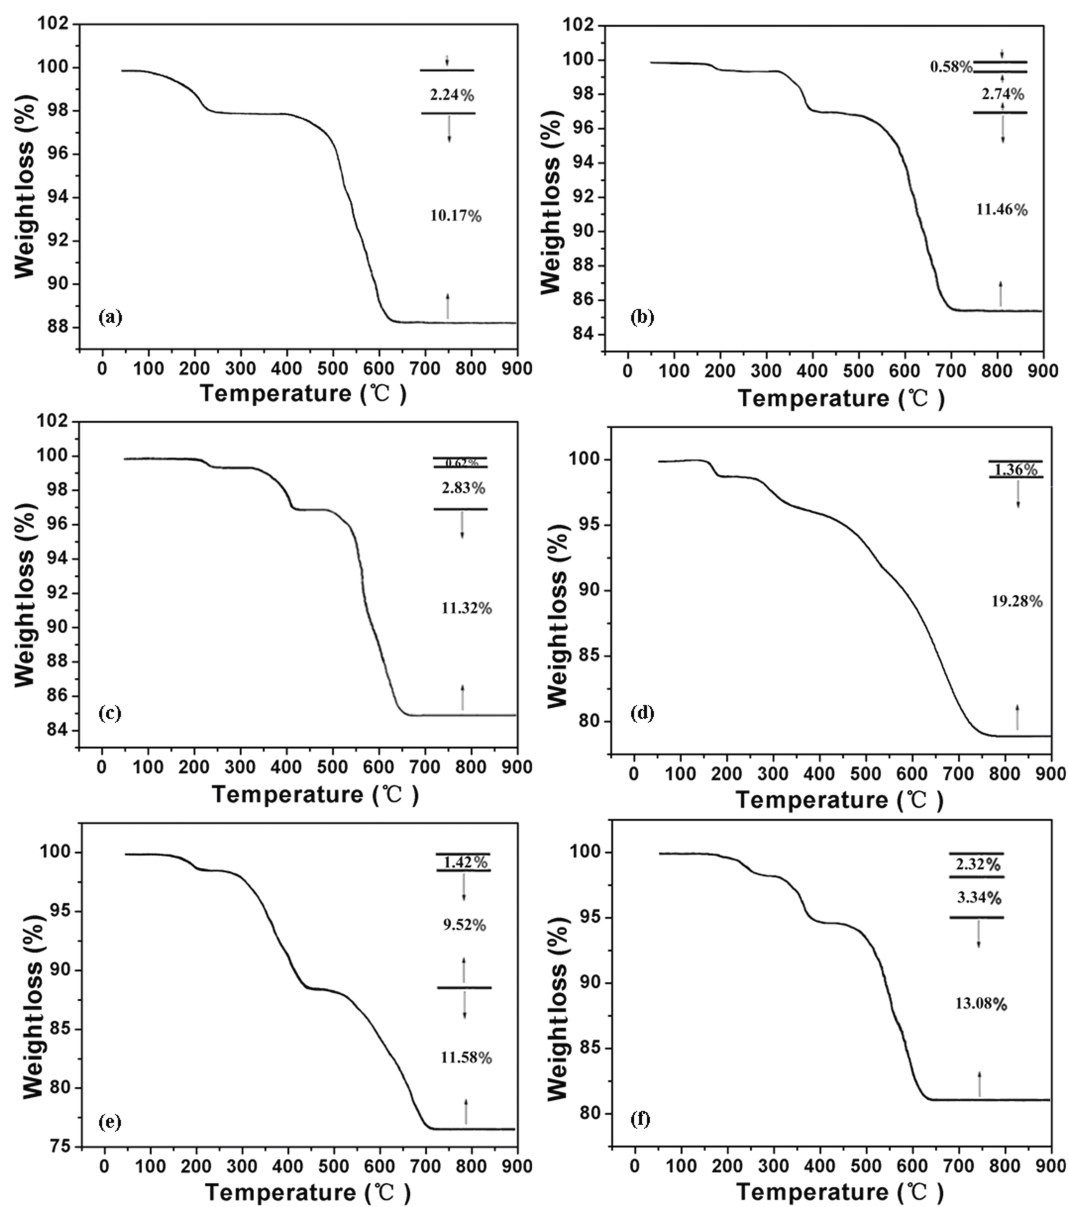

**Fig. S13** TG of (a) compound 1, (b) compound 2, (c) compound 3, (d) compound 4, (e) compound 5, and (f) compound 6.

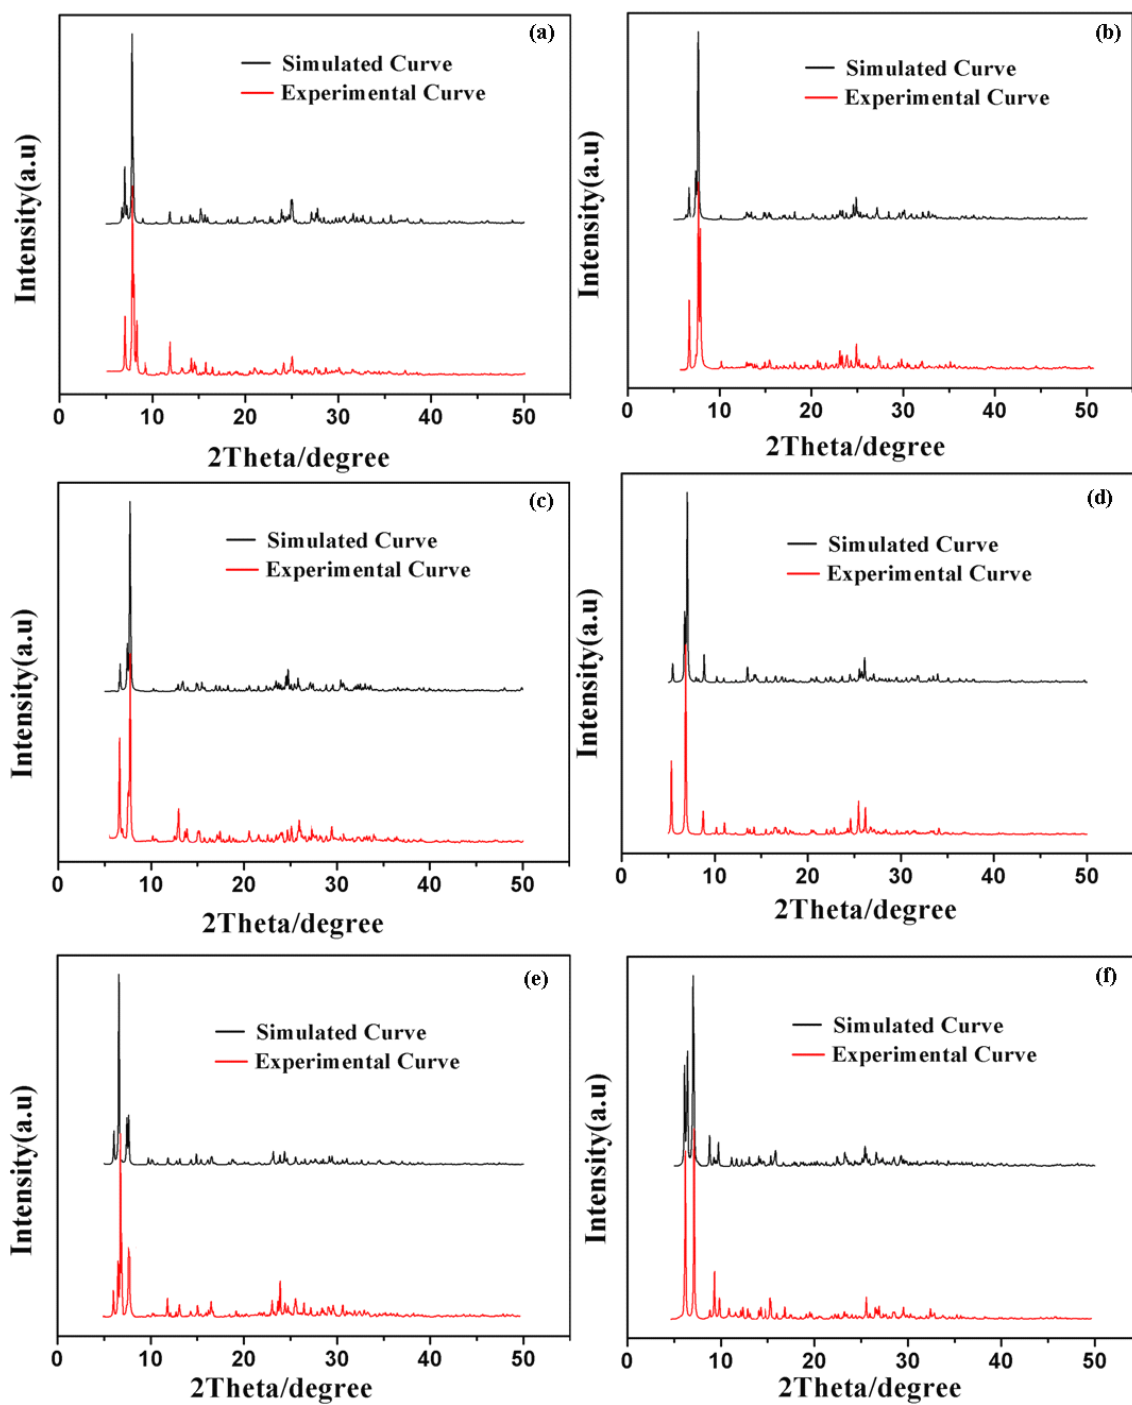

**Figure S14.** The XPRD contrast curves of compound **1 (a)**, compound **2 (b)**, compound **3 (c)**, compound **4 (d)**, compound **5 (e)**, and compound **6 (f)**.



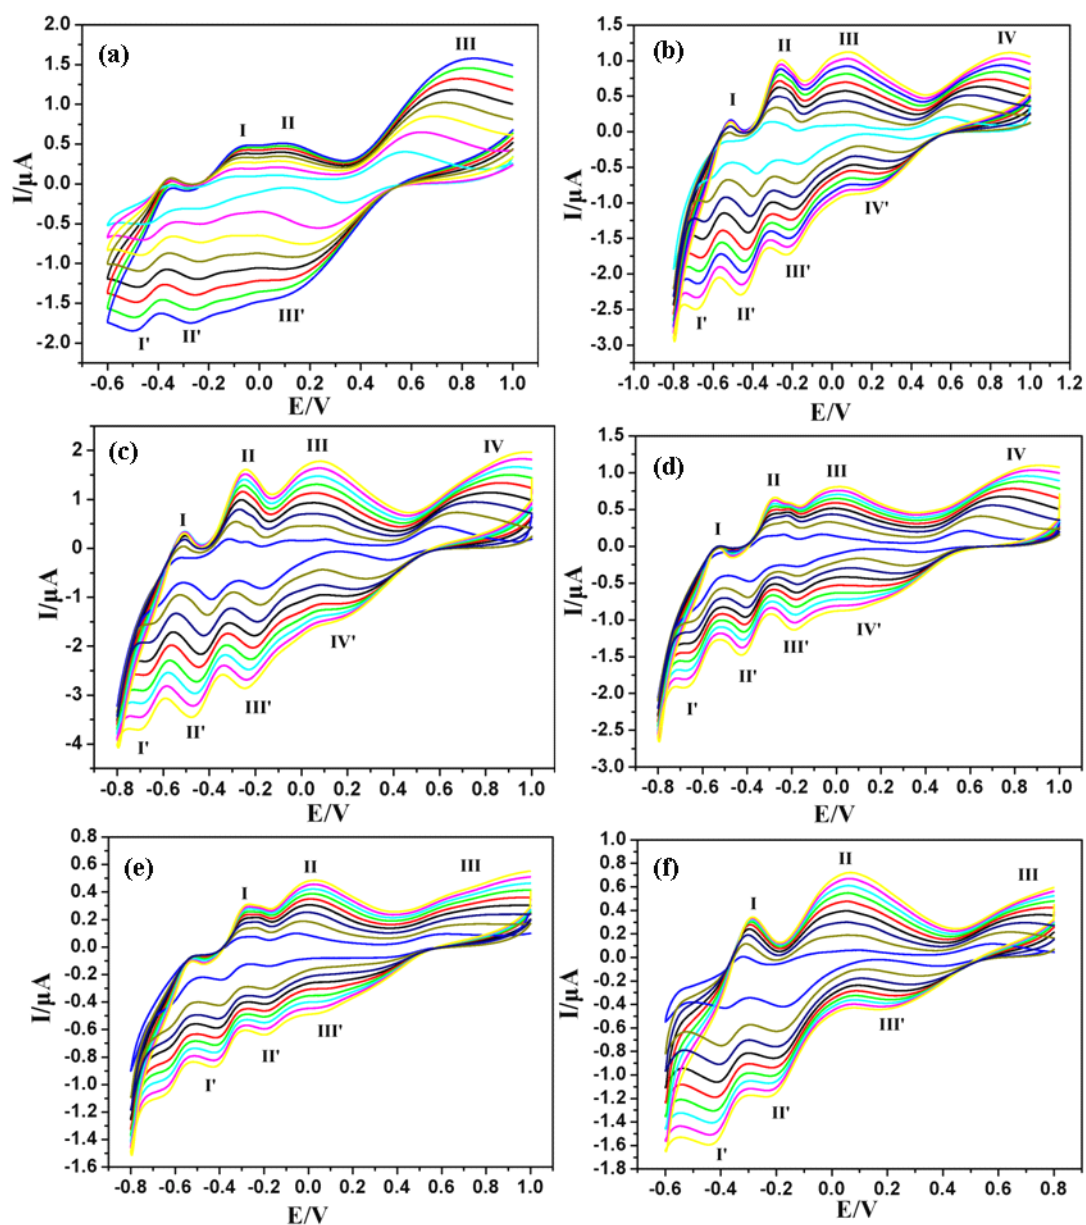

**Fig. S15** Cyclic voltammograms of (a) 1-CPE, (b) 2-CPE, (c) 3-CPE, (d) 4-CPE, (d) 5-CPE, and (e) 6-CPE, rates (from inner to outer: 20, 50, 80, 110, 140, 170, 200, 230, 260  $\text{mV s}^{-1}$ ).

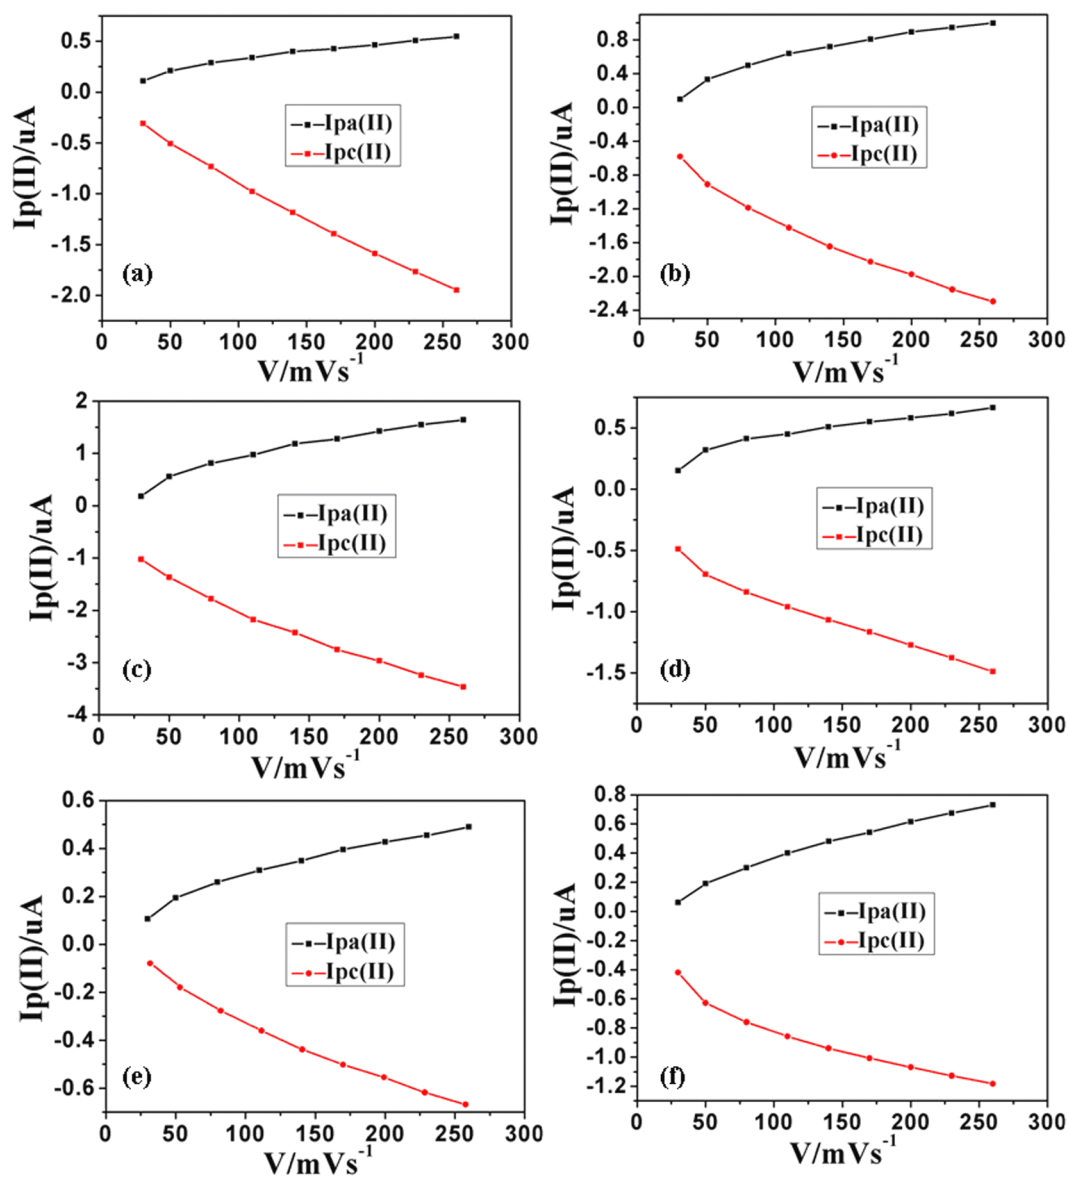

**Fig. S16** The dependence of anodic peak II current on scan rates for compound **1** (a), compound **2** (b), compound **3** (c), compound **4** (d), compound **5** (e), and compound **6** (f).

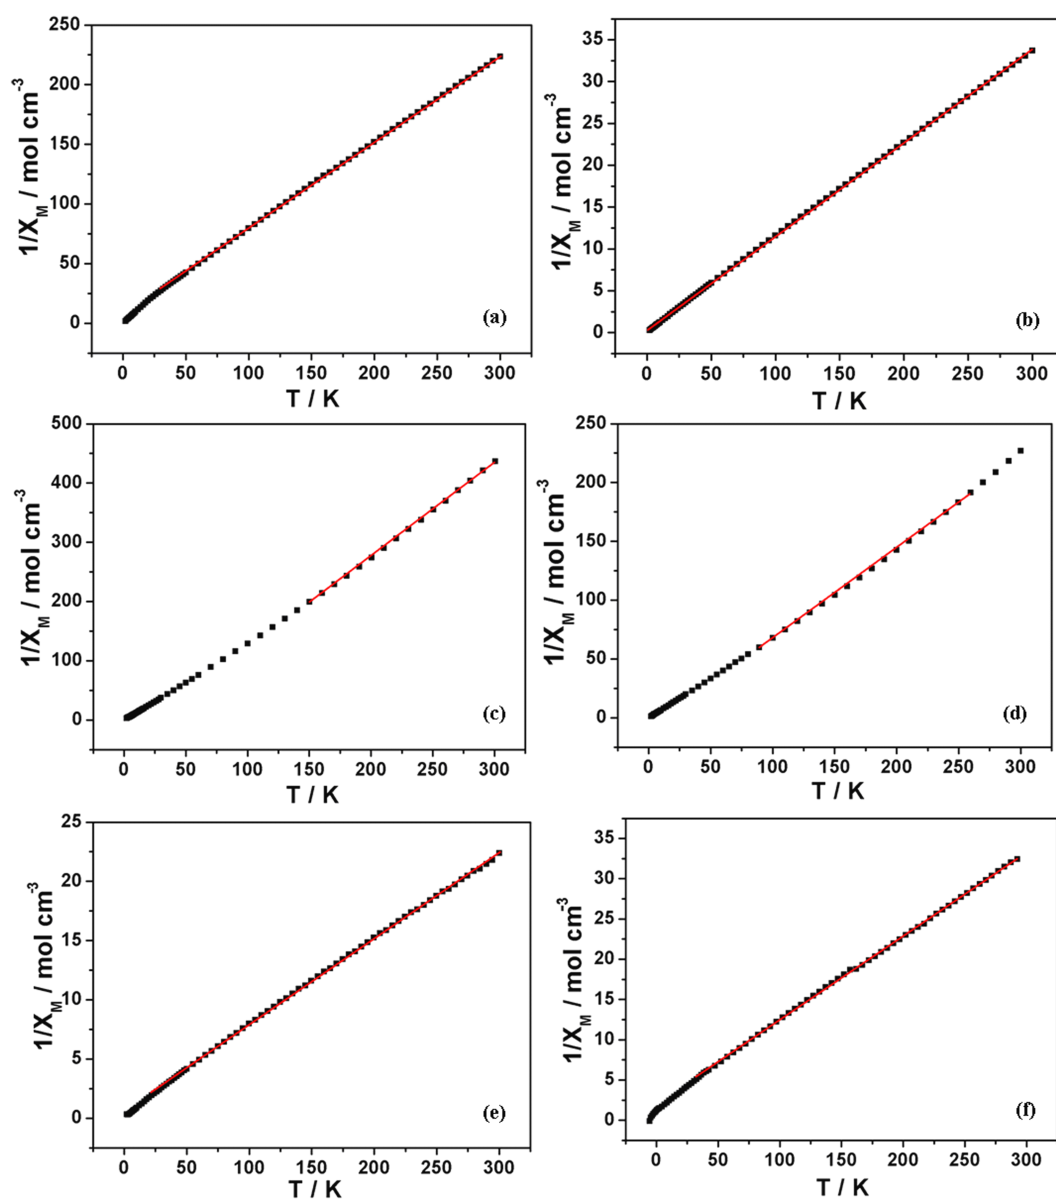

**Fig. S17** Temperature dependences of  $\chi_m^{-1}$  for compound **1** (a), compound **2** (b), compound **3** (c), compound **4** (d), compound **5** (e), and compound **6** (f).
